# Supplementary material for: A Genomic Quantitative Study on the Contribution of the Ancestral-State Bases Relative to Derived Bases in the Divergence and Local Adaptation of Populus davidiana
Source: MDPI journal article supplement (doi:10.3390/genes14040821), 2023-03-29
Supplement: s1 [file s1]

## *Supplementary Tables*

**Table S1. Overview information of Illumina re-sequencing data per sample of *Populus davidiana*.**

| Sample ID      | Location     | Latitude | Longitude | Mapping rate (%) | Mean Coverage |
|----------------|--------------|----------|-----------|------------------|---------------|
| <b>North</b>   |              |          |           |                  |               |
| HM8            | Heilongjiang | 51.7398  | 126.6566  | 85.38%           | 25.5492       |
| HM18           | Heilongjiang | 51.7343  | 126.6750  | 87.01%           | 26.7308       |
| HM21           | Heilongjiang | 51.7293  | 126.6612  | 83.61%           | 27.6120       |
| HM23           | Heilongjiang | 51.7231  | 126.6566  | 84.57%           | 34.5065       |
| HH1            | Heilongjiang | 50.2557  | 127.5166  | 85.14%           | 28.0336       |
| HH2            | Heilongjiang | 50.2503  | 127.5414  | 84.23%           | 26.5943       |
| HH12           | Heilongjiang | 50.2410  | 127.5435  | 84.88%           | 25.3972       |
| HH16           | Heilongjiang | 50.2351  | 127.5224  | 85.19%           | 31.0539       |
| HH23           | Heilongjiang | 50.2330  | 127.5076  | 86.32%           | 23.0257       |
| SYS30          | Heilongjiang | 46.6521  | 131.1886  | 84.61%           | 20.6160       |
| SYS33          | Heilongjiang | 46.6432  | 131.1714  | 85.32%           | 23.5610       |
| HN2            | Heilongjiang | 46.2669  | 130.5964  | 84.82%           | 24.7351       |
| HN9            | Heilongjiang | 46.2276  | 130.5346  | 84.31%           | 26.1190       |
| LHS3           | Jilin        | 43.8972  | 125.5465  | 86.03%           | 25.7924       |
| LHS8           | Jilin        | 43.8967  | 125.5591  | 85.70%           | 26.7667       |
| LHS14          | Jilin        | 43.8716  | 125.8380  | 85.50%           | 38.1427       |
| LHS15          | Jilin        | 43.8817  | 125.5506  | 85.18%           | 22.8187       |
| SS1            | Jilin        | 43.7027  | 123.9385  | 83.65%           | 21.5635       |
| SS15           | Jilin        | 43.6943  | 123.9190  | 85.92%           | 33.8928       |
| SS18           | Jilin        | 43.6926  | 123.8781  | 84.87%           | 20.9121       |
| SS24           | Jilin        | 43.6907  | 123.8518  | 86.14%           | 18.5633       |
| BSS1           | Jilin        | 43.5914  | 127.5697  | 85.14%           | 25.9662       |
| BSS2           | Jilin        | 43.5833  | 127.5693  | 84.39%           | 23.1904       |
| BSS15          | Jilin        | 43.5764  | 127.5736  | 82.99%           | 35.3335       |
| BSS18          | Jilin        | 43.5662  | 127.5679  | 84.77%           | 37.2733       |
| BSS20          | Jilin        | 43.5545  | 127.5666  | 83.65%           | 30.8521       |
| JSZ17          | Jilin        | 43.1700  | 126.8245  | 85.47%           | 22.3994       |
| JSZ18          | Jilin        | 43.1621  | 126.8175  | 83.98%           | 23.6758       |
| JSZ22          | Jilin        | 43.1505  | 126.8074  | 83.90%           | 26.8231       |
| JSZ25          | Jilin        | 43.1422  | 126.7857  | 84.94%           | 36.0175       |
| Mean           |              |          |           | 84.92%           | 27.1173       |
| <b>Central</b> |              |          |           |                  |               |
| WC1            | Hebei        | 41.9506  | 117.7609  | 84.17%           | 30.0849       |
| WC2            | Hebei        | 41.9368  | 117.7639  | 84.16%           | 27.2286       |
| WC8            | Hebei        | 41.9281  | 117.7670  | 82.57%           | 24.4892       |

|                  |           |         |          |        |         |
|------------------|-----------|---------|----------|--------|---------|
| XLM1             | Beijing   | 39.9691 | 115.4722 | 84.45% | 31.2666 |
| XLM2             | Beijing   | 39.9735 | 115.4723 | 83.51% | 33.3467 |
| XLM21            | Beijing   | 39.9750 | 115.4790 | 82.90% | 29.6745 |
| XLM22            | Beijing   | 39.9689 | 115.4822 | 83.38% | 29.1875 |
| XLM23            | Beijing   | 39.9660 | 115.4838 | 83.19% | 30.0837 |
| HL1              | Beijing   | 39.9776 | 116.0702 | 84.25% | 30.0600 |
| HL2              | Beijing   | 39.9761 | 116.0767 | 84.06% | 32.5832 |
| HL5              | Beijing   | 39.9754 | 116.0812 | 82.94% | 27.4777 |
| HL6              | Beijing   | 39.9725 | 116.0846 | 83.57% | 28.5164 |
| HL7              | Beijing   | 39.9709 | 116.0932 | 83.99% | 23.4592 |
| HL8              | Beijing   | 39.9699 | 116.1003 | 83.30% | 23.9004 |
| WT1              | Shanxi    | 38.9858 | 113.5825 | 85.45% | 27.2519 |
| WT2              | Shanxi    | 38.9809 | 113.5841 | 85.13% | 29.4578 |
| WT16             | Shanxi    | 38.9776 | 113.5842 | 85.72% | 25.8835 |
| GDS1             | Shanxi    | 37.8856 | 111.5516 | 85.83% | 24.2600 |
| GDS5             | Shanxi    | 37.8818 | 111.5556 | 83.53% | 31.3641 |
| GDS8             | Shanxi    | 37.8776 | 111.5590 | 85.30% | 26.6884 |
| GDS19            | Shanxi    | 37.8727 | 111.5591 | 84.74% | 27.6472 |
| GDS27            | Shanxi    | 37.8691 | 111.5563 | 85.81% | 28.9126 |
| GS2              | Gansu     | 34.5972 | 105.7400 | 84.23% | 31.6469 |
| HeN1             | Henan     | 34.3105 | 111.0871 | 84.19% | 34.3747 |
| HeN2             | Henan     | 34.3074 | 111.0748 | 84.66% | 28.6066 |
| BTM3             | Henan     | 33.4056 | 111.9983 | 85.20% | 37.2249 |
| BTM17            | Henan     | 33.3795 | 111.9517 | 84.92% | 30.7627 |
| WS1              | Chongqing | 31.1029 | 109.8972 | 84.30% | 25.4904 |
| WS2              | Chongqing | 31.0734 | 109.8776 | 85.26% | 22.5582 |
| Mean             |           |         |          | 84.30% | 28.7410 |
| <b>Southwest</b> |           |         |          |        |         |
| DXP2             | Sichuan   | 27.5275 | 102.3197 | 84.70% | 31.7036 |
| DXP4             | Sichuan   | 27.5323 | 102.3195 | 84.68% | 30.2657 |
| DXP5             | Sichuan   | 27.5294 | 102.3201 | 81.96% | 22.2481 |
| DXP8             | Sichuan   | 27.5259 | 102.3172 | 82.32% | 21.3713 |
| JBG1             | Sichuan   | 27.4273 | 102.1368 | 81.39% | 32.0898 |
| JBG2             | Sichuan   | 27.4244 | 102.1233 | 84.99% | 27.6572 |
| JBG3             | Sichuan   | 27.4265 | 102.1182 | 84.03% | 32.1805 |
| WN1              | Guizhou   | 26.9049 | 104.2931 | 84.46% | 33.5209 |
| WN4              | Guizhou   | 26.8886 | 104.2765 | 84.19% | 31.6999 |
| LJ1              | Yunnan    | 26.8897 | 100.3083 | 83.93% | 22.0907 |
| LJ2              | Yunnan    | 26.8852 | 100.3004 | 84.17% | 21.9906 |
| LJ3              | Yunnan    | 26.8792 | 100.3042 | 84.38% | 36.9759 |
| LJ4              | Yunnan    | 26.8536 | 100.3045 | 85.28% | 24.0629 |
| LJ5              | Yunnan    | 26.8454 | 100.3067 | 83.50% | 23.8363 |
| LJ6              | Yunnan    | 26.8268 | 100.3093 | 84.37% | 24.3539 |

|      |        |         |          |        |         |
|------|--------|---------|----------|--------|---------|
| LJ7  | Yunnan | 26.8159 | 100.3098 | 85.03% | 25.9548 |
| LJ8  | Yunnan | 26.7980 | 100.3092 | 83.81% | 21.6704 |
| LJ9  | Yunnan | 26.7861 | 100.3023 | 84.19% | 24.1840 |
| JC6  | Yunnan | 26.5505 | 99.9192  | 83.72% | 24.5643 |
| JC13 | Yunnan | 26.5449 | 99.9101  | 81.52% | 26.9000 |
| DL2  | Yunnan | 25.7103 | 100.3680 | 83.93% | 26.6903 |
| DL3  | Yunnan | 25.7053 | 100.3644 | 83.98% | 30.2712 |
| DL13 | Yunnan | 25.6992 | 100.3634 | 81.66% | 22.7873 |
| DL14 | Yunnan | 25.6918 | 100.3617 | 82.35% | 28.2417 |
| DL16 | Yunnan | 25.6805 | 100.3588 | 81.92% | 26.6723 |
| KM1  | Yunnan | 24.8305 | 102.8719 | 84.37% | 31.9678 |
| KM3  | Yunnan | 24.8284 | 102.8613 | 84.02% | 30.5924 |
| KM11 | Yunnan | 24.8224 | 102.8517 | 85.04% | 22.8253 |
| KM12 | Yunnan | 24.8191 | 102.8439 | 84.84% | 20.9141 |
| KM18 | Yunnan | 24.8146 | 102.8334 | 82.43% | 26.0161 |
| KM19 | Yunnan | 24.8101 | 102.8216 | 81.92% | 27.3672 |
| Mean |        |         |          | 83.65% | 26.8925 |

---

**Table S2. Parameter settings and results for 21 demographic models associated with Figure S1.**

**(a) The setting ranges of the parameter estimation.** “pop0” represents central population, “pop1” represents southwest population, “pop2” represents north population.

### Model 1

[PARAMETERS]

##isInt? #name #dist.#min #max

//all Ns are in number of haploid individuals

|   |          |      |     |     |        |
|---|----------|------|-----|-----|--------|
| 1 | N_POP0   | unif | 1e4 | 5e6 | output |
| 1 | N_POP1   | unif | 1e4 | 5e6 | output |
| 1 | N_POP2   | unif | 1e4 | 5e6 | output |
| 1 | N_ANCA11 | unif | 1e4 | 5e6 | output |
| 1 | N_ANC12  | unif | 1e4 | 5e6 | output |
| 1 | TDIV12   | unif | 1e4 | 1e6 | output |
| 1 | TPLUS12  | unif | 1e4 | 1e6 | hide   |

[RULES]

[COMPLEX PARAMETERS]

|   |             |                    |        |
|---|-------------|--------------------|--------|
| 1 | TDIV0_ANC12 | = TDIV12+TPLUS12   | output |
| 0 | RELANC12    | = N_ANC12/N_POP2   | hide   |
| 0 | RELANC02    | = N_ANCA11/N_ANC12 | hide   |

### Model 2

[PARAMETERS]

##isInt? #name #dist.#min #max

//all Ns are in number of haploid individuals

|   |          |      |     |     |        |
|---|----------|------|-----|-----|--------|
| 1 | N_POP0   | unif | 1e4 | 5e6 | output |
| 1 | N_POP1   | unif | 1e4 | 5e6 | output |
| 1 | N_POP2   | unif | 1e4 | 5e6 | output |
| 1 | N_ANCA11 | unif | 1e4 | 5e6 | output |
| 1 | N_ANC20  | unif | 1e4 | 5e6 | output |
| 1 | TDIV20   | unif | 1e4 | 1e6 | output |
| 1 | TPLUS20  | unif | 1e4 | 1e6 | hide   |

[RULES]

[COMPLEX PARAMETERS]

|   |             |                    |        |
|---|-------------|--------------------|--------|
| 1 | TDIV1_ANC20 | = TDIV20+TPLUS20   | output |
| 0 | RELANC20    | = N_ANC20/N_POP0   | hide   |
| 0 | RELANC10    | = N_ANCA11/N_ANC20 | hide   |

### Model 3

[PARAMETERS]

##isInt? #name #dist.#min #max

//all Ns are in number of haploid individuals

|   |        |      |     |     |        |
|---|--------|------|-----|-----|--------|
| 1 | N_POP0 | unif | 1e4 | 5e6 | output |
|---|--------|------|-----|-----|--------|

|   |          |      |     |     |        |
|---|----------|------|-----|-----|--------|
| 1 | N_POP1   | unif | 1e4 | 5e6 | output |
| 1 | N_POP2   | unif | 1e4 | 5e6 | output |
| 1 | N_ANCA11 | unif | 1e4 | 5e6 | output |
| 1 | N_ANC01  | unif | 1e4 | 5e6 | output |
| 1 | TDIV01   | unif | 1e4 | 1e6 | output |
| 1 | TPLUS01  | unif | 1e4 | 1e6 | hide   |

[RULES]

[COMPLEX PARAMETERS]

|   |             |                    |        |
|---|-------------|--------------------|--------|
| 1 | TDIV2_ANC01 | = TDIV01+TPLUS01   | output |
| 0 | RELANC01    | = N_ANC01/N_POP1   | hide   |
| 0 | RELANC21    | = N_ANCA11/N_ANC01 | hide   |

#### Model 4

[PARAMETERS]

##isInt? #name #dist.#min #max

//all Ns are in number of haploid individuals

|   |          |      |     |     |        |
|---|----------|------|-----|-----|--------|
| 1 | N_POP0   | unif | 1e4 | 5e6 | output |
| 1 | N_POP1   | unif | 1e4 | 5e6 | output |
| 1 | N_POP2   | unif | 1e4 | 5e6 | output |
| 1 | N_ANCA11 | unif | 1e4 | 5e6 | output |
| 1 | TDIV     | unif | 1e4 | 1e6 | output |

[RULES]

[COMPLEX PARAMETERS]

|   |        |                |      |
|---|--------|----------------|------|
| 0 | RELANC | = N_ANC/N_POP0 | hide |
|---|--------|----------------|------|

#### Model 5

[PARAMETERS]

##isInt? #name #dist.#min #max

//all Ns are in number of haploid individuals

|   |             |      |      |     |              |
|---|-------------|------|------|-----|--------------|
| 1 | N_POP0      | unif | 1e4  | 5e6 | output       |
| 1 | N_POP1      | unif | 1e4  | 5e6 | output       |
| 1 | N_POP2      | unif | 1e4  | 5e6 | output       |
| 1 | N_ANCA11    | unif | 1e4  | 5e6 | output       |
| 1 | N_ANC20     | unif | 1e4  | 5e6 | output       |
| 0 | RELstartBOT | unif | 1e-4 | 1   | hide bounded |
| 1 | N_ancPOP1   | unif | 1    | 1e6 | output       |
| 0 | multTbot    | unif | 1e-4 | 1   | hide bounded |
| 1 | TDIV20      | unif | 1e4  | 1e6 | output       |
| 1 | TPLUS20     | unif | 1e4  | 1e6 | hide         |

[RULES]

[COMPLEX PARAMETERS]

|   |             |                  |        |
|---|-------------|------------------|--------|
| 1 | TDIV1_ANC20 | = TDIV20+TPLUS20 | output |
| 1 | TforBotN    | = TDIV20-1000    | hide   |

```

1 AuxforBotN = TforBotN*multTbot      hide
1 TBOT_Nend   = 1000+AuxforBotN      output
1 TBOT_Nstart = TBOT_Nend-1000      output
1 N_BOT1      = RELstartBOT*N_POP1   output
0 RELendBOT   = N_ancPOP1/N_BOT1     hide
0 RELANC10    = N_ANCA11/N_ANC20     hide
0 RELANC20    = N_ANC20/N_POP0       hide

```

## Model 6

### [PARAMETERS]

```

##isInt? #name      #dist.#min  #max
//all Ns are in number of haploid individuals
1 N_POP0      unif      1e4      5e6      output
1 N_POP1      unif      1e4      5e6      output
1 N_POP2      unif      1e4      5e6      output
1 N_ANCA11    unif      1e4      5e6      output
1 N_ANC20     unif      1e4      5e6      output
0 RELstartBOT unif      1e-4      1        hide    bounded
1 N_ancPOP1    unif      1          1e6      output
0 multTbot     unif      1e-4      1        hide    bounded
1 TDIV20       unif      1e4      1e6      output
1 TPLUS20      unif      1e4      1e6      hide

```

### [RULES]

### [COMPLEX PARAMETERS]

```

1 TDIV1_ANC20 = TDIV20+TPLUS20      output
1 TPLUS21     = TPLUS20-1000         hide
1 AuxforBotN  = TPLUS21*multTbot     hide
1 TBOT_Nstart = TDIV20+AuxforBotN    output
1 TBOT_Nend   = TBOT_Nstart+1000     output
1 N_BOT1      = RELstartBOT*N_POP1   output
0 RELendBOT   = N_ancPOP1/N_BOT1     hide
0 RELANC10    = N_ANCA11/N_ANC20     hide
0 RELANC20    = N_ANC20/N_POP0       hide

```

## Model 7

### [PARAMETERS]

```

##isInt? #name      #dist.#min  #max
//all Ns are in number of haploid individuals
1 N_POP0      unif      1e4      5e6      output
1 N_POP1      unif      1e4      5e6      output
1 N_POP2      unif      1e4      5e6      output
1 N_ANCA11    unif      1e4      5e6      output
1 N_ANC20     unif      1e4      5e6      output

```

|   |             |      |      |     |        |         |
|---|-------------|------|------|-----|--------|---------|
| 0 | RELstartBOT | unif | 1e-4 | 1   | hide   | bounded |
| 1 | N_ancPOP2   | unif | 1    | 1e6 | output |         |
| 0 | multTbot    | unif | 1e-4 | 1   | hide   | bounded |
| 1 | TDIV20      | unif | 1e4  | 1e6 | output |         |
| 1 | TPLUS20     | unif | 1e4  | 1e6 | hide   |         |

[RULES]

[COMPLEX PARAMETERS]

|   |             |                      |        |
|---|-------------|----------------------|--------|
| 1 | TDIV1_ANC20 | = TDIV20+TPLUS20     | output |
| 1 | TforBotN    | = TDIV20-1000        | hide   |
| 1 | AuxforBotN  | = TforBotN*multTbot  | hide   |
| 1 | TBOT_Nend   | = 1000+AuxforBotN    | output |
| 1 | TBOT_Nstart | = TBOT_Nend-1000     | output |
| 1 | N_BOT2      | = RELstartBOT*N_POP2 | output |
| 0 | RElendBOT   | = N_ancPOP2/N_BOT2   | hide   |
| 0 | RELANC10    | = N_ANCA11/N_ANC20   | hide   |
| 0 | RELANC20    | = N_ANC20/N_POP0     | hide   |

## Model 8

[PARAMETERS]

##isInt? #name #dist.#min #max

//all Ns are in number of haploid individuals

|   |             |      |      |     |        |         |
|---|-------------|------|------|-----|--------|---------|
| 1 | N_POP0      | unif | 1e4  | 5e6 | output |         |
| 1 | N_POP1      | unif | 1e4  | 5e6 | output |         |
| 1 | N_POP2      | unif | 1e4  | 5e6 | output |         |
| 1 | N_ANCA11    | unif | 1e4  | 5e6 | output |         |
| 1 | N_ANC20     | unif | 1e4  | 5e6 | output |         |
| 0 | RELstartBOT | unif | 1e-4 | 1   | hide   | bounded |
| 1 | N_ancPOP0   | unif | 1    | 1e6 | output |         |
| 0 | multTbot    | unif | 1e-4 | 1   | hide   | bounded |
| 1 | TDIV20      | unif | 1e4  | 1e6 | output |         |
| 1 | TPLUS20     | unif | 1e4  | 1e6 | hide   |         |

[RULES]

[COMPLEX PARAMETERS]

|   |             |                      |        |
|---|-------------|----------------------|--------|
| 1 | TDIV1_ANC20 | = TDIV20+TPLUS20     | output |
| 1 | TforBotN    | = TDIV20-1000        | hide   |
| 1 | AuxforBotN  | = TforBotN*multTbot  | hide   |
| 1 | TBOT_Nend   | = 1000+AuxforBotN    | output |
| 1 | TBOT_Nstart | = TBOT_Nend-1000     | output |
| 1 | N_BOT0      | = RELstartBOT*N_POP0 | output |
| 0 | RElendBOT   | = N_ancPOP0/N_BOT0   | hide   |
| 0 | RELANC10    | = N_ANCA11/N_ANC20   | hide   |
| 0 | RELANC20    | = N_ANC20/N_POP0     | hide   |

## Model 9

### [PARAMETERS]

##isInt? #name #dist.#min #max

//all Ns are in number of haploid individuals

|   |             |      |      |     |        |         |
|---|-------------|------|------|-----|--------|---------|
| 1 | N_POP0      | unif | 1e4  | 5e6 | output |         |
| 1 | N_POP1      | unif | 1e4  | 5e6 | output |         |
| 1 | N_POP2      | unif | 1e4  | 5e6 | output |         |
| 1 | N_ANCA11    | unif | 1e4  | 5e6 | output |         |
| 1 | N_ANC20     | unif | 1e4  | 5e6 | output |         |
| 0 | RELstartBOT | unif | 1e-4 | 1   | hide   | bounded |
| 1 | N_ancPOP0   | unif | 1    | 1e6 | output |         |
| 0 | multTbot    | unif | 1e-4 | 1   | hide   | bounded |
| 1 | TDIV20      | unif | 1e4  | 1e6 | output |         |
| 1 | TPLUS20     | unif | 1e4  | 1e6 | hide   |         |

### [RULES]

#### [COMPLEX PARAMETERS]

|   |             |                      |        |
|---|-------------|----------------------|--------|
| 1 | TDIV1_ANC20 | = TDIV20+TPLUS20     | output |
| 1 | TPLUS21     | = TPLUS20-1000       | hide   |
| 1 | AuxforBotN  | = TPLUS21*multTbot   | hide   |
| 1 | TBOT_Nstart | = TDIV20+AuxforBotN  | output |
| 1 | TBOT_Nend   | = TBOT_Nstart+1000   | output |
| 1 | N_BOT0      | = RELstartBOT*N_POP0 | output |
| 0 | RELEndBOT   | = N_ancPOP0/N_BOT0   | hide   |
| 0 | RELANC10    | = N_ANCA11/N_ANC20   | hide   |
| 0 | RELANC20    | = N_ANC20/N_POP0     | hide   |

## Model 10

### [PARAMETERS]

##isInt? #name #dist.#min #max

//all Ns are in number of haploid individuals

|   |          |      |      |     |        |  |
|---|----------|------|------|-----|--------|--|
| 1 | N_POP0   | unif | 1e4  | 5e6 | output |  |
| 1 | N_POP1   | unif | 1e4  | 5e6 | output |  |
| 1 | N_POP2   | unif | 1e4  | 5e6 | output |  |
| 1 | N_ANCA11 | unif | 1e4  | 5e6 | output |  |
| 1 | N_ANC20  | unif | 1e4  | 5e6 | output |  |
| 0 | N1RESIZE | unif | 1e-4 | 1   | hide   |  |
| 1 | TDIV20   | unif | 1e4  | 1e6 | output |  |
| 1 | TPLUS20  | unif | 1e4  | 1e6 | hide   |  |

### [RULES]

#### [COMPLEX PARAMETERS]

|   |             |                    |        |
|---|-------------|--------------------|--------|
| 1 | TDIV1_ANC20 | = TDIV20+TPLUS20   | output |
| 1 | N1atSPLIT   | = N_POP1*N1RESIZE  | output |
| 0 | RELANC10    | = N_ANCA11/N_ANC20 | hide   |



|   |                              |        |
|---|------------------------------|--------|
| 0 | RELANC20 = N_ANC20/N_POP0    | hide   |
| 0 | tmpRATIO1 = N1atSPLIT/N_POP1 | hide   |
| 0 | tmplogP1 = log(tmpRATIO1)    | hide   |
| 0 | GrowthP1 = tmplogP1/TDIV20   | output |

### Model 11

#### [PARAMETERS]

##isInt? #name #dist.#min #max

//all Ns are in number of haploid individuals

|   |          |      |      |     |        |
|---|----------|------|------|-----|--------|
| 1 | N_POP0   | unif | 1e4  | 5e6 | output |
| 1 | N_POP1   | unif | 1e4  | 5e6 | output |
| 1 | N_POP2   | unif | 1e4  | 5e6 | output |
| 1 | N_ANCA11 | unif | 1e4  | 5e6 | output |
| 1 | N_ANC20  | unif | 1e4  | 5e6 | output |
| 0 | N1RESIZE | unif | 1e-4 | 1   | hide   |
| 1 | TDIV20   | unif | 1e4  | 1e6 | output |
| 1 | TPLUS20  | unif | 1e4  | 1e6 | hide   |

#### [RULES]

#### [COMPLEX PARAMETERS]

|   |                              |        |
|---|------------------------------|--------|
| 1 | TDIV1_ANC20 = TDIV20+TPLUS20 | output |
| 1 | N1atSPLIT = N_POP1*N1RESIZE  | output |
| 0 | RELANC10 = N_ANCA11/N_ANC20  | hide   |
| 0 | RELANC20 = N_ANC20/N_POP0    | hide   |
| 0 | tmpRATIO1 = N1atSPLIT/N_POP1 | hide   |
| 0 | tmplogP1 = log(tmpRATIO1)    | hide   |
| 0 | GrowthP1 = tmplogP1/TDIV20   | output |

### Model 12

#### [PARAMETERS]

##isInt? #name #dist.#min #max

//all Ns are in number of haploid individuals

|   |          |      |      |     |        |
|---|----------|------|------|-----|--------|
| 1 | N_POP0   | unif | 1e4  | 5e6 | output |
| 1 | N_POP1   | unif | 1e4  | 5e6 | output |
| 1 | N_POP2   | unif | 1e4  | 5e6 | output |
| 1 | N_ANCA11 | unif | 1e4  | 5e6 | output |
| 1 | N_ANC20  | unif | 1e4  | 5e6 | output |
| 0 | N2RESIZE | unif | 1e-4 | 1   | hide   |
| 1 | TDIV20   | unif | 1e4  | 1e6 | output |
| 1 | TPLUS20  | unif | 1e4  | 1e6 | hide   |

#### [RULES]

#### [COMPLEX PARAMETERS]

|   |                              |        |
|---|------------------------------|--------|
| 1 | TDIV1_ANC20 = TDIV20+TPLUS20 | output |
| 1 | N2atSPLIT = N_POP2*N2RESIZE  | output |

|   |                              |        |
|---|------------------------------|--------|
| 0 | RELANC10 = N_ANCA11/N_ANC20  | hide   |
| 0 | RELANC20 = N_ANC20/N_POP0    | hide   |
| 0 | tmpRATIO2 = N2atSPLIT/N_POP2 | hide   |
| 0 | tmplogP2 = log(tmpRATIO2)    | hide   |
| 0 | GrowthP2 = tmplogP2/TDIV20   | output |

### Model 13

#### [PARAMETERS]

##isInt? #name #dist.#min #max

//all Ns are in number of haploid individuals

|   |          |      |      |     |        |
|---|----------|------|------|-----|--------|
| 1 | N_POP0   | unif | 1e4  | 5e6 | output |
| 1 | N_POP1   | unif | 1e4  | 5e6 | output |
| 1 | N_POP2   | unif | 1e4  | 5e6 | output |
| 1 | N_ANCA11 | unif | 1e4  | 5e6 | output |
| 1 | N_ANC20  | unif | 1e4  | 5e6 | output |
| 0 | N0RESIZE | unif | 1e-4 | 1   | hide   |
| 1 | TDIV20   | unif | 1e4  | 1e6 | output |
| 1 | TPLUS20  | unif | 1e4  | 1e6 | hide   |

#### [RULES]

#### [COMPLEX PARAMETERS]

|   |                              |        |
|---|------------------------------|--------|
| 1 | TDIV1_ANC20 = TDIV20+TPLUS20 | output |
| 1 | N0atSPLIT = N_POP0*N0RESIZE  | output |
| 0 | RELANC10 = N_ANCA11/N_ANC20  | hide   |
| 0 | RELANC20 = N_ANC20/N_POP0    | hide   |
| 0 | tmpRATIO0 = N0atSPLIT/N_POP0 | hide   |
| 0 | tmplogP0 = log(tmpRATIO0)    | hide   |
| 0 | GrowthP0 = tmplogP0/TDIV20   | output |

### Model 14

#### [PARAMETERS]

##isInt? #name #dist.#min #max

//all Ns are in number of haploid individuals

|   |          |      |      |     |        |
|---|----------|------|------|-----|--------|
| 1 | N_POP0   | unif | 1e4  | 5e6 | output |
| 1 | N_POP1   | unif | 1e4  | 5e6 | output |
| 1 | N_POP2   | unif | 1e4  | 5e6 | output |
| 1 | N_ANCA11 | unif | 1e4  | 5e6 | output |
| 1 | N_ANC20  | unif | 1e4  | 5e6 | output |
| 0 | N0RESIZE | unif | 1e-4 | 1   | hide   |
| 1 | TDIV20   | unif | 1e4  | 1e6 | output |
| 1 | TPLUS20  | unif | 1e4  | 1e6 | hide   |

#### [RULES]

#### [COMPLEX PARAMETERS]

|   |                              |        |
|---|------------------------------|--------|
| 1 | TDIV1_ANC20 = TDIV20+TPLUS20 | output |
|---|------------------------------|--------|

|   |            |   |                  |        |
|---|------------|---|------------------|--------|
| 1 | N0atSPLIT  | = | N_POP0*N0RESIZE  | output |
| 0 | RELANC10   | = | N_ANCA11/N_ANC20 | hide   |
| 0 | RELANC20   | = | N_ANC20/N_POP0   | hide   |
| 0 | tmpRATIOPO | = | N0atSPLIT/N_POP0 | hide   |
| 0 | tmplogP0   | = | log(tmpRATIOPO)  | hide   |
| 0 | GrowthP0   | = | tmplogP0/TDIV20  | output |

## Model 15

### [PARAMETERS]

##isInt? #name #dist.#min #max

//all Ns are in number of haploid individuals

|   |           |      |      |     |        |         |
|---|-----------|------|------|-----|--------|---------|
| 1 | N_ANCA11  | unif | 10   | 2e6 | output |         |
| 1 | N_ANC20   | unif | 10   | 2e6 | output |         |
| 1 | N_POP0    | unif | 10   | 2e6 | output |         |
| 1 | N_POP1    | unif | 10   | 2e6 | output |         |
| 1 | N_POP2    | unif | 10   | 2e6 | output |         |
| 1 | N_BOT1    | unif | 1    | 1e6 | output |         |
| 1 | N_BOT2    | unif | 1    | 1e6 | output |         |
| 1 | N_ancPOP0 | unif | 10   | 2e6 | output |         |
| 0 | N0RESIZE  | unif | 1e-4 | 1   | hide   |         |
| 1 | N_ancPOP1 | unif | 10   | 2e6 | output |         |
| 0 | multTbot1 | unif | 1e-3 | 1   | hide   | bounded |
| 1 | N_ancPOP2 | unif | 10   | 2e6 | output |         |
| 0 | multTbot2 | unif | 1e-3 | 1   | hide   | bounded |
| 1 | TDIV20    | unif | 10   | 8e4 | output |         |
| 1 | TPLUS20   | unif | 10   | 8e4 | hide   |         |

### [RULES]

### [COMPLEX PARAMETERS]

|   |              |   |                    |        |
|---|--------------|---|--------------------|--------|
| 1 | TDIV1_ANC20  | = | TDIV20+TPLUS20     | output |
| 1 | TforBotN     | = | TDIV20-1000        | hide   |
| 1 | AuxforBotN1  | = | TforBotN*multTbot1 | hide   |
| 1 | TBOT_Nend1   | = | 1000+AuxforBotN1   | output |
| 1 | TBOT_Nstart1 | = | TBOT_Nend1-1000    | output |
| 1 | AuxforBotN2  | = | TforBotN*multTbot2 | hide   |
| 1 | TBOT_Nend2   | = | 1000+AuxforBotN2   | output |
| 1 | TBOT_Nstart2 | = | TBOT_Nend2-1000    | output |
| 1 | N0atSPLIT    | = | N_POP0*N0RESIZE    | output |
| 0 | RELstartBOT1 | = | N_BOT1/N_POP1      | hide   |
| 0 | RELEndBOT1   | = | N_ancPOP1/N_BOT1   | hide   |
| 0 | RELstartBOT2 | = | N_BOT2/N_POP2      | hide   |
| 0 | RELEndBOT2   | = | N_ancPOP2/N_BOT2   | hide   |
| 0 | RELANC10     | = | N_ANCA11/N_ANC20   | hide   |
| 0 | RELANC20     | = | N_ANC20/N_ancPOP0  | hide   |

|   |                               |        |
|---|-------------------------------|--------|
| 0 | tmpRATIOPO = N0atSPLIT/N_POP0 | hide   |
| 0 | tmplogP0 = log(tmpRATIOPO)    | hide   |
| 0 | GrowthP0 = tmplogP0/TDIV20    | output |

## Model 16

### [PARAMETERS]

##isInt? #name #dist.#min #max

//all Ns are in number of haploid individuals

|   |              |         |      |     |              |
|---|--------------|---------|------|-----|--------------|
| 1 | N_POP0       | unif    | 1e4  | 5e6 | output       |
| 1 | N_POP1       | unif    | 1e4  | 5e6 | output       |
| 1 | N_POP2       | unif    | 1e4  | 5e6 | output       |
| 1 | N_ANCA1      | unif    | 1e4  | 5e6 | output       |
| 1 | N_ANC20      | unif    | 1e4  | 5e6 | output       |
| 1 | N_ancPOP1    | unif    | 1    | 1e6 | output       |
| 1 | N_ancPOP2    | unif    | 1    | 1e6 | output       |
| 0 | multTbot1    | unif    | 1e-4 | 1   | hide bounded |
| 0 | multTbot2    | unif    | 1e-4 | 1   | hide bounded |
| 0 | RELstartBOT1 | unif    | 1e-4 | 1   | hide bounded |
| 0 | RELstartBOT2 | unif    | 1e-4 | 1   | hide bounded |
| 0 | N0RESIZE     | unif    | 1e-4 | 1   | hide         |
| 1 | TDIV20       | unif    | 1e4  | 1e6 | output       |
| 1 | TPLUS20      | unif    | 1e4  | 1e6 | hide         |
| 0 | NM01         | logunif | 1e-5 | 5   | hide bounded |
| 0 | NM10         | logunif | 1e-5 | 5   | hide bounded |
| 0 | NM02         | logunif | 1e-5 | 5   | hide bounded |
| 0 | NM20         | logunif | 1e-5 | 5   | hide bounded |
| 0 | NM12         | logunif | 1e-5 | 5   | hide bounded |
| 0 | NM21         | logunif | 1e-5 | 5   | hide bounded |
| 0 | NM1A         | logunif | 1e-5 | 5   | hide bounded |
| 0 | NMA1         | logunif | 1e-5 | 5   | hide bounded |

### [RULES]

### [COMPLEX PARAMETERS]

|   |                                  |        |
|---|----------------------------------|--------|
| 0 | MIG01 = NM01/N_POP0              | output |
| 0 | MIG10 = NM10/N_POP1              | output |
| 0 | MIG02 = NM02/N_POP0              | output |
| 0 | MIG20 = NM20/N_POP2              | output |
| 0 | MIG12 = NM12/N_POP1              | output |
| 0 | MIG21 = NM21/N_POP2              | output |
| 0 | MIG1A = NM1A/N_POP1              | output |
| 0 | MIGA1 = NMA1/N_ANC20             | output |
| 1 | TDIV1_ANC20 = TDIV20+TPLUS20     | output |
| 1 | TforBotN = TDIV20-1000           | hide   |
| 1 | AuxforBotN1 = TforBotN*multTbot1 | hide   |

|   |              |                       |        |
|---|--------------|-----------------------|--------|
| 1 | TBOT_Nend1   | = 1000+AuxforBotN1    | output |
| 1 | TBOT_Nstart1 | = TBOT_Nend1-1000     | output |
| 1 | AuxforBotN2  | = TforBotN*multTbot2  | hide   |
| 1 | TBOT_Nend2   | = 1000+AuxforBotN2    | output |
| 1 | TBOT_Nstart2 | = TBOT_Nend2-1000     | output |
| 1 | N0atSPLIT    | = N_POP0*N0RESIZE     | output |
| 1 | N_BOT1       | = RELstartBOT1*N_POP1 | output |
| 0 | RELEndBOT1   | = N_ancPOP1/N_BOT1    | hide   |
| 1 | N_BOT2       | = RELstartBOT2*N_POP2 | output |
| 0 | RELEndBOT2   | = N_ancPOP2/N_BOT2    | hide   |
| 0 | RELANC10     | = N_ANCA11/N_ANC20    | hide   |
| 0 | RELANC20     | = N_ANC20/N_POP0      | hide   |
| 0 | tmpRATIOPO   | = N0atSPLIT/N_POP0    | hide   |
| 0 | tmplogP0     | = log(tmpRATIOPO)     | hide   |
| 0 | GrowthP0     | = tmplogP0/TDIV20     | output |

## Model 17

### [PARAMETERS]

##isInt? #name #dist.#min #max

//all Ns are in number of haploid individuals

|   |              |         |      |     |              |
|---|--------------|---------|------|-----|--------------|
| 1 | N_POP0       | unif    | 1e4  | 5e6 | output       |
| 1 | N_POP1       | unif    | 1e4  | 5e6 | output       |
| 1 | N_POP2       | unif    | 1e4  | 5e6 | output       |
| 1 | N_ANCA11     | unif    | 1e4  | 2e7 | output       |
| 1 | N_ANC20      | unif    | 1e4  | 5e6 | output       |
| 1 | N_ancPOP1    | unif    | 1    | 1e6 | output       |
| 1 | N_ancPOP2    | unif    | 1    | 1e6 | output       |
| 0 | multTbot1    | unif    | 1e-4 | 1   | hide bounded |
| 0 | multTbot2    | unif    | 1e-4 | 1   | hide bounded |
| 0 | RELstartBOT1 | unif    | 1e-4 | 1   | hide bounded |
| 0 | RELstartBOT2 | unif    | 1e-4 | 1   | hide bounded |
| 0 | N0RESIZE     | unif    | 1e-4 | 1   | hide         |
| 1 | TDIV20       | unif    | 1e4  | 1e6 | output       |
| 1 | TPLUS20      | unif    | 1e4  | 1e6 | hide         |
| 0 | NM01         | logunif | 1e-5 | 5   | hide bounded |
| 0 | NM10         | logunif | 1e-5 | 5   | hide bounded |
| 0 | NM02         | logunif | 1e-5 | 5   | hide bounded |
| 0 | NM20         | logunif | 1e-5 | 5   | hide bounded |
| 0 | NM12         | logunif | 1e-5 | 5   | hide bounded |
| 0 | NM21         | logunif | 1e-5 | 5   | hide bounded |

### [RULES]

### [COMPLEX PARAMETERS]

|   |       |               |        |
|---|-------|---------------|--------|
| 0 | MIG01 | = NM01/N_POP0 | output |
|---|-------|---------------|--------|

|   |                |                     |        |
|---|----------------|---------------------|--------|
| 0 | MIG10 =        | NM10/N_POP1         | output |
| 0 | MIG02 =        | NM02/N_POP0         | output |
| 0 | MIG20 =        | NM20/N_POP2         | output |
| 0 | MIG12 =        | NM12/N_POP1         | output |
| 0 | MIG21 =        | NM21/N_POP2         | output |
| 1 | TDIV1_ANC20 =  | TDIV20+TPLUS20      | output |
| 1 | TforBotN =     | TDIV20-1000         | hide   |
| 1 | AuxforBotN1 =  | TforBotN*multTbot1  | hide   |
| 1 | TBOT_Nend1 =   | 1000+AuxforBotN1    | output |
| 1 | TBOT_Nstart1 = | TBOT_Nend1-1000     | output |
| 1 | AuxforBotN2 =  | TforBotN*multTbot2  | hide   |
| 1 | TBOT_Nend2 =   | 1000+AuxforBotN2    | output |
| 1 | TBOT_Nstart2 = | TBOT_Nend2-1000     | output |
| 1 | N0atSPLIT =    | N_POP0*N0RESIZE     | output |
| 1 | N_BOT1 =       | RELstartBOT1*N_POP1 | output |
| 0 | RELEndBOT1 =   | N_ancPOP1/N_BOT1    | hide   |
| 1 | N_BOT2 =       | RELstartBOT2*N_POP2 | output |
| 0 | RELEndBOT2 =   | N_ancPOP2/N_BOT2    | hide   |
| 0 | RELANC10 =     | N_ANCA11/N_ANC20    | hide   |
| 0 | RELANC20 =     | N_ANC20/N_POP0      | hide   |
| 0 | tmpRATIOPO =   | N0atSPLIT/N_POP0    | hide   |
| 0 | tmplogP0 =     | log(tmpRATIOPO)     | hide   |
| 0 | GrowthP0 =     | tmplogP0/TDIV20     | output |

## Model 18

### [PARAMETERS]

```

##isInt? #name #dist.#min #max
//all Ns are in number of haploid individuals
1 N_POP0 unif 1e4 5e6 output
1 N_POP1 unif 1e4 5e6 output
1 N_POP2 unif 1e4 5e6 output
1 N_ANCA11 unif 1e4 5e6 output
1 N_ANC20 unif 1e4 5e6 output
1 N_ancPOP1 unif 1 1e6 output
1 N_ancPOP2 unif 1 1e6 output
0 multTbot1 unif 1e-4 1 hide bounded
0 multTbot2 unif 1e-4 1 hide bounded
0 RELstartBOT1 unif 1e-4 1 hide bounded
0 RELstartBOT2 unif 1e-4 1 hide bounded
0 N0RESIZE unif 1e-4 1 hide
1 TDIV20 unif 1e4 1e6 output
1 TPLUS20 unif 1e4 1e6 hide
0 NM01 logunif 1e-5 5 hide bounded

```

0 NM10           logunif    1e-5    5       hide bounded

[RULES]

[COMPLEX PARAMETERS]

0 MIG01 = NM01/N\_POP0   output  
0 MIG10 = NM10/N\_POP1   output  
1 TDIV1\_ANC20 = TDIV20+TPLUS20       output  
1 TforBotN     = TDIV20-1000       hide  
1 AuxforBotN1  = TforBotN\*multTbot1   hide  
1 TBOT\_Nend1   = 1000+AuxforBotN1   output  
1 TBOT\_Nstart1 = TBOT\_Nend1-1000   output  
1 AuxforBotN2  = TforBotN\*multTbot2   hide  
1 TBOT\_Nend2   = 1000+AuxforBotN2   output  
1 TBOT\_Nstart2 = TBOT\_Nend2-1000   output  
1 N0atSPLIT    = N\_POP0\*N0RESIZE   output  
1 N\_BOT1 = RELstartBOT1\*N\_POP1   output  
0 RELendBOT1   = N\_ancPOP1/N\_BOT1   hide  
1 N\_BOT2 = RELstartBOT2\*N\_POP2   output  
0 RELendBOT2   = N\_ancPOP2/N\_BOT2   hide  
0 RELANC10 = N\_ANCA11/N\_ANC20   hide  
0 RELANC20 = N\_ANC20/N\_POP0   hide  
0 tmpRATIOPO = N0atSPLIT/N\_POP0   hide  
0 tmplogP0     = log(tmpRATIOPO)   hide  
0 GrowthP0     = tmplogP0/TDIV20   output

## Model 19

[PARAMETERS]

##isInt? #name   #dist.#min   #max

//all Ns are in number of haploid individuals

1 N\_POP0       unif    1e4    5e6   output  
1 N\_POP1       unif    1e4    5e6   output  
1 N\_POP2       unif    1e4    5e6   output  
1 N\_ANCA11     unif    1e4    5e6   output  
1 N\_ANC20      unif    1e4    5e6   output  
1 N\_ancPOP1    unif    1       1e6   output  
1 N\_ancPOP2    unif    1       1e6   output  
0 multTbot1    unif    1e-4   1       hide   bounded  
0 multTbot2    unif    1e-4   1       hide   bounded  
0 RELstartBOT1 unif    1e-4   1       hide   bounded  
0 RELstartBOT2 unif    1e-4   1       hide   bounded  
0 N0RESIZE     unif    1e-4   1       hide  
1 TDIV20       unif    1e4    1e6   output  
1 TPLUS20      unif    1e4    1e6   hide  
0 NM12         logunif   1e-5   5       hide bounded

0 NM21           logunif       1e-5    5    hide bounded

[RULES]

[COMPLEX PARAMETERS]

0 MIG12 = NM12/N\_POP1   output  
0 MIG21 = NM21/N\_POP2   output  
1 TDIV1\_ANC20 = TDIV20+TPLUS20       output  
1 TforBotN     = TDIV20-1000           hide  
1 AuxforBotN1  = TforBotN\*multTbot1   hide  
1 TBOT\_Nend1   = 1000+AuxforBotN1       output  
1 TBOT\_Nstart1 = TBOT\_Nend1-1000       output  
1 AuxforBotN2  = TforBotN\*multTbot2   hide  
1 TBOT\_Nend2   = 1000+AuxforBotN2       output  
1 TBOT\_Nstart2 = TBOT\_Nend2-1000       output  
1 N0atSPLIT    = N\_POP0\*N0RESIZE       output  
1 N\_BOT1 = RELstartBOT1\*N\_POP1       output  
0 RELendBOT1   = N\_ancPOP1/N\_BOT1       hide  
1 N\_BOT2 = RELstartBOT2\*N\_POP2       output  
0 RELendBOT2   = N\_ancPOP2/N\_BOT2       hide  
0 RELANC10 = N\_ANCA11/N\_ANC20       hide  
0 RELANC20 = N\_ANC20/N\_POP0       hide  
0 tmpRATIOPO = N0atSPLIT/N\_POP0       hide  
0 tmplogP0     = log(tmpRATIOPO)       hide  
0 GrowthP0     = tmplogP0/TDIV20       output

## Model 20

[PARAMETERS]

##isInt? #name   #dist.#min   #max

//all Ns are in number of haploid individuals

1 N\_POP0       unif       1e4    5e6    output  
1 N\_POP1       unif       1e4    5e6    output  
1 N\_POP2       unif       1e4    5e6    output  
1 N\_ANCA11     unif       1e4    5e6    output  
1 N\_ANC20       unif       1e4    5e6    output  
1 N\_ancPOP1     unif       1       1e6    output  
1 N\_ancPOP2     unif       1       1e6    output  
0 multTbot1     unif       1e-4   1       hide   bounded  
0 multTbot2     unif       1e-4   1       hide   bounded  
0 RELstartBOT1  unif       1e-4   1       hide   bounded  
0 RELstartBOT2  unif       1e-4   1       hide   bounded  
0 N0RESIZE       unif       1e-4   1       hide  
1 TDIV20       unif       1e4    1e6    output  
1 TPLUS20       unif       1e4    1e6    hide  
0 NM02          logunif       1e-5   5       hide bounded



0 NM20           logunif    1e-5    5    hide bounded

[RULES]

[COMPLEX PARAMETERS]

0 MIG02 = NM02/N\_POP0   output  
0 MIG20 = NM20/N\_POP2   output  
1 TDIV1\_ANC20 = TDIV20+TPLUS20       output  
1 TforBotN     = TDIV20-1000           hide  
1 AuxforBotN1  = TforBotN\*multTbot1   hide  
1 TBOT\_Nend1   = 1000+AuxforBotN1      output  
1 TBOT\_Nstart1 = TBOT\_Nend1-1000      output  
1 AuxforBotN2  = TforBotN\*multTbot2   hide  
1 TBOT\_Nend2   = 1000+AuxforBotN2      output  
1 TBOT\_Nstart2 = TBOT\_Nend2-1000      output  
1 N0atSPLIT    = N\_POP0\*N0RESIZE      output  
1 N\_BOT1 = RELstartBOT1\*N\_POP1       output  
0 RELendBOT1    = N\_ancPOP1/N\_BOT1     hide  
1 N\_BOT2 = RELstartBOT2\*N\_POP2       output  
0 RELendBOT2    = N\_ancPOP2/N\_BOT2     hide  
0 RELANC10 = N\_ANCA11/N\_ANC20       hide  
0 RELANC20 = N\_ANC20/N\_POP0       hide  
0 tmpRATIOPO = N0atSPLIT/N\_POP0      hide  
0 tmplogP0     = log(tmpRATIOPO)       hide  
0 GrowthP0     = tmplogP0/TDIV20       output

## Model 21

[PARAMETERS]

##isInt? #name   #dist.#min   #max

//all Ns are in number of haploid individuals

1 N\_POP0       unif    1e4    5e6    output  
1 N\_POP1       unif    1e4    5e6    output  
1 N\_POP2       unif    1e4    5e6    output  
1 N\_ANCA11     unif    1e4    5e6    output  
1 N\_ANC20       unif    1e4    5e6    output  
1 N\_ancPOP1    unif    1       1e6    output  
1 N\_ancPOP2    unif    1       1e6    output  
0 multTbot1    unif    1e-4    1       hide   bounded  
0 multTbot2    unif    1e-4    1       hide   bounded  
0 RELstartBOT1 unif    1e-4    1       hide   bounded  
0 RELstartBOT2 unif    1e-4    1       hide   bounded  
0 N0RESIZE      unif    1e-4    1       hide  
1 TDIV20       unif    1e4    1e6    output  
1 TPLUS20       unif    1e4    1e6    hide  
0 NM01         logunif  1e-5    5       hide bounded

|   |      |         |      |   |      |         |
|---|------|---------|------|---|------|---------|
| 0 | NM10 | logunif | 1e-5 | 5 | hide | bounded |
| 0 | NM02 | logunif | 1e-5 | 5 | hide | bounded |
| 0 | NM20 | logunif | 1e-5 | 5 | hide | bounded |

[RULES]

[COMPLEX PARAMETERS]

|   |              |                       |        |  |
|---|--------------|-----------------------|--------|--|
| 0 | MIG01 =      | NM01/N_POP0           | output |  |
| 0 | MIG10 =      | NM10/N_POP1           | output |  |
| 0 | MIG02 =      | NM02/N_POP0           | output |  |
| 0 | MIG20 =      | NM20/N_POP2           | output |  |
| 1 | TDIV1_ANC20  | = TDIV20+TPLUS20      | output |  |
| 1 | TforBotN     | = TDIV20-1000         | hide   |  |
| 1 | AuxforBotN1  | = TforBotN*multTbot1  | hide   |  |
| 1 | TBOT_Nend1   | = 1000+AuxforBotN1    | output |  |
| 1 | TBOT_Nstart1 | = TBOT_Nend1-1000     | output |  |
| 1 | AuxforBotN2  | = TforBotN*multTbot2  | hide   |  |
| 1 | TBOT_Nend2   | = 1000+AuxforBotN2    | output |  |
| 1 | TBOT_Nstart2 | = TBOT_Nend2-1000     | output |  |
| 1 | N0atSPLIT    | = N_POP0*N0RESIZE     | output |  |
| 1 | N_BOT1       | = RELstartBOT1*N_POP1 | output |  |
| 0 | RElendBOT1   | = N_ancPOP1/N_BOT1    | hide   |  |
| 1 | N_BOT2       | = RELstartBOT2*N_POP2 | output |  |
| 0 | RElendBOT2   | = N_ancPOP2/N_BOT2    | hide   |  |
| 0 | RELANC10     | = N_ANCA11/N_ANC20    | hide   |  |
| 0 | RELANC20     | = N_ANC20/N_POP0      | hide   |  |
| 0 | tmpRATIOPO   | = N0atSPLIT/N_POP0    | hide   |  |
| 0 | tmplogP0     | = log(tmpRATIOPO)     | hide   |  |
| 0 | GrowthP0     | = tmplogP0/TDIV20     | output |  |

**(d) Relative likelihood.**

| Model    | Max(log10(Lhood) <sub>i</sub> ) <sup>a</sup> | No. Of parameters(d) | AIC <sub>i</sub> <sup>b</sup> | Δ <sub>i</sub> <sup>b</sup> | Model normalized relative likelihood(w <sub>i</sub> ) <sup>b</sup> |
|----------|----------------------------------------------|----------------------|-------------------------------|-----------------------------|--------------------------------------------------------------------|
| Model 1  | -183620336.094                               | 7                    | 845602911.321                 | 48328356.603                | ~0                                                                 |
| Model 2  | -182950790.659                               | 7                    | 842519540.646                 | 45244985.928                | ~0                                                                 |
| Model 3  | -183626375.203                               | 7                    | 845630722.446                 | 48356167.728                | ~0                                                                 |
| Model 4  | -182958064.512                               | 5                    | 842553033.977                 | 45278479.259                | ~0                                                                 |
| Model 5  | -182692586.123                               | 10                   | 841330470.815                 | 44055916.097                | ~0                                                                 |
| Model 6  | -182786507.661                               | 10                   | 841762995.481                 | 44488440.764                | ~0                                                                 |
| Model 7  | -182912941.285                               | 10                   | 842345243.837                 | 45070689.119                | ~0                                                                 |
| Model 8  | -182950190.341                               | 10                   | 842516782.079                 | 45242227.361                | ~0                                                                 |
| Model 9  | -183076857.076                               | 10                   | 843100103.951                 | 45825549.233                | ~0                                                                 |
| Model 10 | -182800713.652                               | 8                    | 841828412.488                 | 44553857.770                | ~0                                                                 |
| Model 11 | -182790253.257                               | 8                    | 841780240.588                 | 44505685.871                | ~0                                                                 |
| Model 12 | -182949026.673                               | 8                    | 842511419.190                 | 45236864.472                | ~0                                                                 |
| Model 13 | -182948113.875                               | 8                    | 842507215.600                 | 45232660.882                | ~0                                                                 |
| Model 14 | -182961108.378                               | 8                    | 842567057.498                 | 45292502.780                | ~0                                                                 |
| Model 15 | -182651175.982                               | 14                   | 841139778.068                 | 43865223.350                | ~0                                                                 |
| Model 16 | -173153191.191                               | 22                   | 797399957.681                 | 125402.964                  | ~0                                                                 |
| Model 17 | -173125961.152                               | 20                   | 797274554.718                 | 0                           | 1                                                                  |
| Model 18 | -175100515.214                               | 16                   | 806367704.215                 | 9093149.497                 | ~0                                                                 |
| Model 19 | -175448902.218                               | 16                   | 807972085.659                 | 10697530.941                | ~0                                                                 |
| Model 20 | -181643144.752                               | 16                   | 836497626.701                 | 39223071.983                | ~0                                                                 |
| Model 21 | -173502427.952                               | 18                   | 799008244.401                 | 1733689.683                 | ~0                                                                 |

<sup>a</sup> Based on the best likelihood among the 50 independent runs for each model (Figure S1).

<sup>b</sup> The calculation of AIC<sub>i</sub>, Δ<sub>i</sub> and w<sub>i</sub> are according to the methods shown in Excoffier *et al.* (2013).

**Table S3. Summary population genetic statistics in the whole-genome of *Populus davidiana* (the mean±standard deviation values are displayed).**

| Parameters                                             | Population        | Whole-genome      |
|--------------------------------------------------------|-------------------|-------------------|
| $\ln(\theta\pi \times 10^4 + 1)$                       | North             | 4.3109(±0.8213)   |
|                                                        | Central           | 4.2593(±0.8284)   |
|                                                        | Southwest         | 4.0750(±0.8669)   |
| Tajima's <i>D</i>                                      | North             | 0.5385(±0.7286)   |
|                                                        | Central           | 0.4208(±0.7764)   |
|                                                        | Southwest         | 0.8467(±0.8996)   |
| Fay & Wu's <i>H</i>                                    | North             | 0.0109(±0.2479)   |
|                                                        | Central           | -0.0330(±0.2791)  |
|                                                        | Southwest         | -0.1821(±0.4332)  |
| $\ln(r^2 + 1)$                                         | North             | 0.1632(±0.0930)   |
|                                                        | Central           | 0.1715(±0.1031)   |
|                                                        | Southwest         | 0.2379(±0.1463)   |
| recombination rate ( $\rho$ )                          | North             | 18.5441(±17.6823) |
|                                                        | Central           | 17.8010(±16.6714) |
|                                                        | Southwest         | 15.0683(±18.1228) |
| $\ln(\text{Fixed} + 1)$ (%)<br>(derived bases)         | North             | 0.0043(±0.0067)   |
|                                                        | Central (N-C)     | 0.0063(±0.0089)   |
|                                                        | Central (C-S)     | 0.0067(±0.0110)   |
|                                                        | Southwest         | 0.0175(±0.0225)   |
| $\ln(\text{Fixed} + 1)$ (%)<br>(ancestral-state bases) | North             | 0.0530(±0.0247)   |
|                                                        | Central (N-C)     | 0.0662(±0.0289)   |
|                                                        | Central (C-S)     | 0.0661(±0.0294)   |
|                                                        | Southwest         | 0.1150(±0.0471)   |
| $\ln(\text{Shared} + 1)$ (%)                           | North-Central     | 0.2462(±0.0185)   |
|                                                        | Central-Southwest | 0.2133(±0.0351)   |
| $F_{ST}$ (actual)                                      | North-Central     | 0.0778(±0.0587)   |
|                                                        | Central-Southwest | 0.2066(±0.1372)   |
|                                                        | North-Southwest   | 0.2331(±0.1377)   |
| $F_{ST}$ (simulated)                                   | North-Central     | 0.0761(±0.0278)   |
|                                                        | Central-Southwest | 0.2018(±0.0593)   |
| $\ln(d_{xy} + 1)$                                      | North-Central     | 0.1731(±0.1568)   |
|                                                        | Central-Southwest | 0.2638(±0.2090)   |

Notes: Central (N-C) represent parameters of the central population of *P. davidiana* according to the North-Central populations, Central (C-S) represent parameters of the central population according to the Central-Southwest populations.

**Table S4. Summary statistics comparing regions showing high genetic differentiation with other genomic regions of *Populus davidiana* (the mean±standard deviation values are displayed).**

| Parameters                                              |     | Population | Regions displaying high differentiation | Background         |
|---------------------------------------------------------|-----|------------|-----------------------------------------|--------------------|
| $\ln(\theta\pi \times 10^4 + 1)$                        | N-C | North      | 3.4589(±1.2089)**                       | 4.3126(±0.8195)    |
|                                                         |     | Central    | 3.2355(±1.1049)***                      | 4.2614(±0.8265)    |
|                                                         | C-S | Central    | 3.4806(±0.8846)***                      | 4.2634(±0.8261)    |
|                                                         |     | Southwest  | 2.8751(±0.9217)***                      | 4.0813(±0.8622)    |
| Tajima's <i>D</i>                                       | N-C | North      | 0.5706(±0.8835)                         | 0.5224(±0.7193)    |
|                                                         |     | Central    | -0.0607(±1.0307)**                      | 0.4015(±0.7660)    |
|                                                         | C-S | Central    | -0.2295(±0.9335)***                     | 0.4039(±0.7645)    |
|                                                         |     | Southwest  | -0.6945(±0.9961)***                     | 0.8483(±0.8935)    |
| Fay & Wu's <i>H</i>                                     | N-C | North      | -0.4103(±0.4389)***                     | 0.0118(±0.2467)    |
|                                                         |     | Central    | -0.5418(±0.4733)***                     | -0.0320(±0.2777)   |
|                                                         | C-S | Central    | -0.4514(±0.4156)***                     | -0.0308(±0.2766)   |
|                                                         |     | Southwest  | -1.1463(±0.7140)***                     | -0.1771(±0.4255)   |
| $\ln(r^2 + 1)$                                          | N-C | North      | 0.2635(±0.1418)**                       | 0.1631(±0.0928)    |
|                                                         |     | Central    | 0.3822(±0.1660)***                      | 0.1712(±0.1026)    |
|                                                         | C-S | Central    | 0.2540(±0.1418)***                      | 0.1711(±0.1027)    |
|                                                         |     | Southwest  | 0.2687(±0.1921)                         | 0.2377(±0.1460)    |
| $\ln(\text{Fixed} + 1) (\%)$<br>(derived bases)         | N-C | North      | 0.0075(±0.0162)                         | 0.0043(±0.0067)    |
|                                                         |     | Central    | 0.0134(±0.0169)**                       | 0.0063(±0.0089)    |
|                                                         | C-S | Central    | 0.0444(±0.0407)***                      | 0.0065(±0.0102)    |
|                                                         |     | Southwest  | 0.0722(±0.0689)***                      | 0.0172(±0.0216)    |
| $\ln(\text{Fixed} + 1) (\%)$<br>(ancestral-state bases) | N-C | North      | 0.0564(±0.0379)▲▲▲                      | 0.0530(±0.0246)▲▲▲ |
|                                                         |     | Central    | 0.0883(±0.0410)** ▲▲▲                   | 0.0662(±0.0288)▲▲▲ |
|                                                         | C-S | Central    | 0.1004(±0.0575)*** ▲▲▲                  | 0.0659(±0.0290)▲▲▲ |
|                                                         |     | Southwest  | 0.1897(±0.0831)*** ▲▲▲                  | 0.1146(±0.0465)▲▲▲ |
| $\ln(\text{Shared} + 1) (\%)$                           | N-C |            | 0.2300(±0.0318)**                       | 0.2462(±0.0184)    |
|                                                         | C-S |            | 0.1158(±0.0596)***                      | 0.2138(±0.0342)    |
| $F_{ST}$                                                | N-C |            | 0.4827(±0.0872)***                      | 0.0769(±0.0558)    |
|                                                         | C-S |            | 0.7504(±0.0503)***                      | 0.2038(±0.1318)    |
| $\ln(d_{xy} + 1)$                                       | N-C |            | 0.1792(±0.1498)                         | 0.1762(±0.1564)    |
|                                                         | C-S |            | 0.2888(±0.2276)                         | 0.2637(±0.2090)    |

Notes: \* indicate significant differences between outliers and background genomic regions, ▲ indicate significant differences between ancestral-state bases and derived bases, by Mann-Whitney U test (\* / ▲  $P$ -value < 0.05; \*\* / ▲▲  $P$ -value < 1e-4; \*\*\* / ▲▲▲  $P$ -value < 2.2e-16).

**Table S5. List of genes located in a region of significantly high genetic differentiation between the north and central populations of *Populus davidiana*.**

| Poplar gene      | Best Arabidopsis hit | Synonyms | Annotated description                                                |
|------------------|----------------------|----------|----------------------------------------------------------------------|
| Potri.001G015300 | AT3G45140            | LOX2     | lipoxygenase 2                                                       |
| Potri.001G058100 | AT1G27290            |          |                                                                      |
| Potri.001G170200 | AT1G17460            | TRFL3    | TRF-like 3                                                           |
| Potri.001G284301 | AT2G14210            | ANR1     | AGAMOUS-like 44                                                      |
| Potri.001G327100 | AT3G27010            | TCP20    | TEOSINTE BRANCHED 1, cycloidea, PCF (TCP)-domain family protein 20   |
| Potri.001G328300 | AT3G01960            | F1C9.26  |                                                                      |
| Potri.001G328600 |                      |          |                                                                      |
| Potri.002G105500 | AT2G01710            |          | Chaperone DnaJ-domain superfamily protein                            |
| Potri.002G105600 |                      |          |                                                                      |
| Potri.002G112300 |                      |          |                                                                      |
| Potri.002G112400 |                      |          |                                                                      |
| Potri.002G112500 | AT5G17870            | PSRP6    | plastid-specific 50S ribosomal protein 6                             |
| Potri.002G112600 | AT1G10020            |          | Protein of unknown function (DUF1005)                                |
| Potri.002G128500 | AT2G26530            | AR781    | Protein of unknown function (DUF1645)                                |
| Potri.002G128700 | AT5G36210            | MAB16.20 | alpha/beta-Hydrolases superfamily protein                            |
| Potri.002G128900 |                      |          |                                                                      |
| Potri.002G129000 | AT4G09680            | CTC1     | conserved telomere maintenance component 1                           |
| Potri.002G129100 |                      |          |                                                                      |
| Potri.002G129166 | AT1G47720            | OSB1     | Primosome PriB/single-strand DNA-binding                             |
| Potri.002G180800 | AT1G01060            | LHY      | Homeodomain-like superfamily protein                                 |
| Potri.002G181000 | AT3G61960            | ATG1A    | Protein kinase superfamily protein                                   |
| Potri.002G260100 |                      |          |                                                                      |
| Potri.004G123900 | AT3G28720            |          | (1 of 1) PTHR31515:SF3 - GENOMIC DNA, CHROMOSOME 3, BAC CLONE: T19N8 |
| Potri.004G124000 | AT3G28730            | SSRP1    | high mobility group                                                  |
| Potri.005G091700 | AT5G23210            | SCPL34   | serine carboxypeptidase-like 34                                      |
| Potri.005G091800 |                      |          |                                                                      |
| Potri.005G131500 | AT5G60150            |          |                                                                      |
| Potri.005G187300 | AT1G21460            | SWEET1   | Nodulin MtN3 family protein                                          |
| Potri.006G083900 | AT5G02540            |          | NAD(P)-binding Rossmann-fold superfamily protein                     |
| Potri.006G166300 | AT5G57360            | ADO1     | Galactose oxidase/kelch repeat superfamily protein                   |

|                  |           |         |                                                                               |
|------------------|-----------|---------|-------------------------------------------------------------------------------|
| Potri.006G166400 | AT2G18910 |         | hydroxyproline-rich glycoprotein family protein                               |
| Potri.006G166500 | AT2G18900 |         | Transducin/WD40 repeat-like superfamily protein                               |
| Potri.006G166800 |           |         |                                                                               |
| Potri.006G234500 | AT5G11700 |         | (1 of 2) PTHR31513:SF1 - GLYCINE-RICH PROTEIN                                 |
| Potri.006G234600 | AT3G05230 |         | Signal peptidase subunit                                                      |
| Potri.006G238566 |           |         |                                                                               |
| Potri.007G031200 | AT2G18630 |         | Protein of unknown function (DUF677)                                          |
| Potri.010G078500 | AT5G43720 | MQD19.5 | Protein of unknown function (DUF2361)                                         |
| Potri.010G078600 | AT5G02940 |         | Protein of unknown function (DUF1012)                                         |
| Potri.010G079700 |           |         |                                                                               |
| Potri.010G144400 | AT3G17030 |         | Nucleic acid-binding proteins superfamily                                     |
| Potri.010G144500 | AT3G66654 | CYP21-4 | Cyclophilin-like peptidyl-prolyl cis-trans isomerase family protein           |
| Potri.010G176300 | AT3G12680 | HUA1    | floral homeotic protein (HUA1)                                                |
| Potri.010G176400 | AT1G54350 | ABCC2   | ABC transporter family protein                                                |
| Potri.010G176600 | AT1G79580 | SMB     | NAC (No Apical Meristem) domain transcriptional regulator superfamily protein |
| Potri.010G180300 | AT3G48480 |         | Cysteine proteinases superfamily protein                                      |
| Potri.010G180400 | AT5G36790 | PGLP1B  | Haloacid dehalogenase-like hydrolase (HAD) superfamily protein                |
| Potri.010G180500 |           |         |                                                                               |
| Potri.011G150700 | AT1G32990 | RPL11   | plastid ribosomal protein l11                                                 |
| Potri.011G150800 |           |         |                                                                               |
| Potri.013G138900 | ATCG00900 | rps7-A  | Ribosomal protein S7p/S5e family protein                                      |
| Potri.013G142232 | ATCG00190 | rpoB    | RNA polymerase subunit beta                                                   |
| Potri.014G095500 | AT2G46370 | JAR1    | Auxin-responsive GH3 family protein                                           |
| Potri.014G180100 | AT3G60160 | ABCC9   | multidrug resistance-associated protein 9                                     |
| Potri.016G106400 |           |         |                                                                               |
| Potri.017G044600 | AT5G64360 | EIP9    | Chaperone DnaJ-domain superfamily protein                                     |
| Potri.018G090400 | AT3G11710 |         | lysyl-tRNA synthetase 1                                                       |
| Potri.018G090700 | AT2G18950 | HPT1    | homogentisate phytyltransferase 1                                             |
| Potri.018G090800 | AT5G57360 | ADO1    | Galactose oxidase/kelch repeat superfamily protein                            |

---

**Table S6. List of genes located in a region of significantly high genetic differentiation between the central and southwest populations of *Populus davidiana*.**

| Poplar gene      | Best Arabidopsis hit | Synonyms | Annotated description                                                                              |
|------------------|----------------------|----------|----------------------------------------------------------------------------------------------------|
| Potri.001G065900 | AT2G33530            | SCPL46   | serine carboxypeptidase-like 46                                                                    |
| Potri.001G066000 | AT1G28100            | NDX1     |                                                                                                    |
| Potri.001G086700 |                      |          |                                                                                                    |
| Potri.001G086800 | AT1G64600            |          | methyltransferases;copper ion binding                                                              |
| Potri.001G086900 | AT4G24050            | T19F6.14 | NAD(P)-binding Rossmann-fold superfamily protein                                                   |
| Potri.001G087100 | AT4G24040            | TRE1     | trehalase 1                                                                                        |
| Potri.001G132900 | AT5G45560            | EDR2L    | Pleckstrin homology (PH) domain-containing protein / lipid-binding START domain-containing protein |
| Potri.001G148100 | AT5G47010            | UPF1     | RNA helicase, putative                                                                             |
| Potri.001G148200 |                      |          |                                                                                                    |
| Potri.001G148300 | AT5G47020            | MQD22.16 |                                                                                                    |
| Potri.001G169700 | AT3G13970            | ATG12B   | Ubiquitin-like superfamily protein                                                                 |
| Potri.001G169900 | AT1G17440            | TAF12B   | Transcription initiation factor TFIID subunit A                                                    |
| Potri.001G191400 | AT3G16370            | APG      | GDSL-like Lipase/Acylhydrolase superfamily protein                                                 |
| Potri.001G191500 | AT3G16380            | PAB6     | poly(A) binding protein 6                                                                          |
| Potri.001G216400 | AT5G22100            |          | RNA cyclase family protein                                                                         |
| Potri.001G216500 | AT5G22120            |          | (1 of 1) PTHR21678 - GROWTH INHIBITION AND DIFFERENTIATION RELATED PROTEIN 88                      |
| Potri.001G266000 |                      |          |                                                                                                    |
| Potri.001G278800 |                      |          |                                                                                                    |
| Potri.001G278900 | AT2G30060            | RANBP1B  | Pleckstrin homology (PH) domain superfamily protein                                                |
| Potri.001G285500 |                      |          |                                                                                                    |
| Potri.001G285600 | AT5G64420            | MSJ1.26  | DNA polymerase V family                                                                            |
| Potri.001G326800 | AT5G14080            |          | Tetratricopeptide repeat (TPR)-like superfamily protein                                            |
| Potri.001G327000 | AT3G01990            | ACR6     | ACT domain repeat 6                                                                                |
| Potri.001G328300 | AT3G01960            | F1C9.26  |                                                                                                    |
| Potri.001G328600 |                      |          |                                                                                                    |
| Potri.001G331500 | AT5G40680            | MNF13.24 | Galactose oxidase/kelch repeat superfamily protein                                                 |
| Potri.001G402500 | AT1G52980            | NUG2     | GTP-binding family protein                                                                         |
| Potri.001G402600 |                      |          |                                                                                                    |



|                  |           |          |                                                                                             |
|------------------|-----------|----------|---------------------------------------------------------------------------------------------|
| Potri.001G402800 | AT3G15430 | MJK13.9  | Regulator of chromosome condensation (RCC1) family protein                                  |
| Potri.002G055000 |           |          |                                                                                             |
| Potri.002G055100 | AT3G59030 | DTX41    | MATE efflux family protein                                                                  |
| Potri.002G110800 |           |          |                                                                                             |
| Potri.002G110900 | AT4G24470 | GATA25   | GATA-type zinc finger protein with TIFY domain                                              |
| Potri.002G111000 | AT1G58230 | BCHB     | binding                                                                                     |
| Potri.002G112100 | AT5G49630 | AAP6     | amino acid permease 6                                                                       |
| Potri.002G113800 | AT1G58520 | RXW8     | lipases;hydrolases, acting on ester bonds                                                   |
| Potri.002G113900 |           |          |                                                                                             |
| Potri.002G128700 | AT5G36210 | MAB16.20 | alpha/beta-Hydrolases superfamily protein                                                   |
| Potri.002G143000 | AT1G02080 |          | transcription regulators                                                                    |
| Potri.002G152100 | AT2G42010 | PLDBETA1 | phospholipase D beta 1                                                                      |
| Potri.002G157200 | AT1G01790 | KEA1     | K <sup>+</sup> efflux antiporter 1                                                          |
| Potri.002G201800 | AT1G54970 | PRP1     | proline-rich protein 1                                                                      |
| Potri.002G201900 | AT2G47540 |          | Pollen Ole e 1 allergen and extensin family protein                                         |
| Potri.002G202000 |           |          |                                                                                             |
| Potri.002G232600 | AT2G31660 | SAD2     | ARM repeat superfamily protein                                                              |
| Potri.003G096100 | AT5G46910 | MQD22.4  | Transcription factor jumonji (jnj) family protein / zinc finger (C5HC2 type) family protein |
| Potri.003G120000 | AT1G63000 | NRS/ER   | nucleotide-rhamnose synthase/epimerase-reductase                                            |
| Potri.003G120101 |           |          |                                                                                             |
| Potri.003G131300 | AT5G41410 | BEL1     | POX (plant homeobox) family protein                                                         |
| Potri.003G131400 | AT4G11350 |          | Protein of unknown function (DUF604)                                                        |
| Potri.004G134200 | AT5G08480 | VQ31     | VQ motif-containing protein                                                                 |
| Potri.004G134300 | AT5G08490 | PCMP-E32 | Tetratricopeptide repeat (TPR)-like superfamily protein                                     |
| Potri.004G134400 |           |          |                                                                                             |
| Potri.004G134500 | AT5G23575 |          | Transmembrane CLPTM1 family protein                                                         |
| Potri.004G201800 | AT2G27460 |          | sec23/sec24 transport family protein                                                        |
| Potri.004G235700 |           |          |                                                                                             |
| Potri.004G235800 | AT2G35610 | XEG113   | xyloglucanase 113                                                                           |
| Potri.004G235900 | AT4G19210 | ABCE2    | RNAse l inhibitor protein 2                                                                 |
| Potri.004G236000 | AT3G07530 | F21O3.24 | (1 of 1) PTHR11203:SF2 - INTEGRATOR COMPLEX SUBUNIT 9                                       |
| Potri.004G236300 | AT4G19190 | PCMP-E1  | zinc knuckle (CCHC-type) family protein                                                     |
| Potri.004G236500 | AT1G31770 | ABCG14   | ATP-binding cassette 14                                                                     |
| Potri.004G236600 | AT1G31780 | COG6     | (1 of 1) PTHR21506 - COMPONENT OF OLIGOMERIC GOLGI COMPLEX 6                                |

|                  |           |          |                                                                          |
|------------------|-----------|----------|--------------------------------------------------------------------------|
| Potri.004G236900 | AT4G19180 | APY7     | GDA1/CD39 nucleoside phosphatase family protein                          |
| Potri.004G237000 |           |          |                                                                          |
| Potri.005G078600 |           |          |                                                                          |
| Potri.005G091600 | AT5G08280 | HEMC     | hydroxymethylbilane synthase                                             |
| Potri.005G093000 | AT5G23110 | MYJ24.15 | Zinc finger, C3HC4 type (RING finger) family protein                     |
| Potri.005G093100 | AT3G18610 | NUCL2    | nucleolin like 2                                                         |
| Potri.005G126600 |           |          |                                                                          |
| Potri.005G126700 | AT5G09380 |          | RNA polymerase III RPC4                                                  |
| Potri.005G151200 |           |          |                                                                          |
| Potri.005G190200 |           |          |                                                                          |
| Potri.005G196400 | AT4G09830 |          | Uncharacterised conserved protein UCP009193                              |
| Potri.005G196500 | AT1G34020 | URGT6    | Nucleotide-sugar transporter family protein                              |
| Potri.005G197000 | AT1G71696 | SOL1     | carboxypeptidase D, putative                                             |
| Potri.005G197200 |           |          |                                                                          |
| Potri.005G210300 | AT4G02780 | GA1      | Terpenoid cyclases/Protein prenyltransferases superfamily protein        |
| Potri.005G225900 | AT2G20495 |          | (1 of 1) PTHR15243 - SERINE/THREONINE-PROTEIN KINASE 19                  |
| Potri.005G226000 | AT3G23300 |          | S-adenosyl-L-methionine-dependent methyltransferases superfamily protein |
| Potri.005G256700 | AT1G20880 |          | RNA-binding (RRM/RBD/RNP motifs) family protein                          |
| Potri.005G257000 | AT1G76490 | HMG1     | hydroxy methylglutaryl CoA reductase 1                                   |
| Potri.005G257100 | AT2G33585 |          |                                                                          |
| Potri.006G028500 |           |          |                                                                          |
| Potri.006G132100 | AT2G37050 | LRR-RLK  | Leucine-rich repeat protein kinase family protein                        |
| Potri.006G143300 | AT2G06210 | VIP6     | binding                                                                  |
| Potri.006G145100 | AT1G17590 | NFYA8    | nuclear factor Y, subunit A8                                             |
| Potri.006G162900 | AT4G28910 | AFPH2    | novel interactor of JAZ                                                  |
| Potri.006G163900 | AT5G19680 |          | Leucine-rich repeat (LRR) family protein                                 |
| Potri.006G164000 | AT2G20000 | CDC27B   | CDC27 family protein                                                     |
| Potri.006G166300 | AT5G57360 | ADO1     | Galactose oxidase/kelch repeat superfamily protein                       |
| Potri.006G166400 | AT2G18910 |          | hydroxyproline-rich glycoprotein family protein                          |
| Potri.006G166500 | AT2G18900 |          | Transducin/WD40 repeat-like superfamily protein                          |
| Potri.006G208800 | AT3G11550 | CASP2    | Uncharacterised protein family (UPF0497)                                 |

|                  |           |           |                                                                          |
|------------------|-----------|-----------|--------------------------------------------------------------------------|
| Potri.006G218100 | AT5G21970 |           | Ubiquitin carboxyl-terminal hydrolase family protein                     |
| Potri.006G238300 |           |           |                                                                          |
| Potri.006G238400 | AT2G25830 |           | YebC-related                                                             |
| Potri.006G238500 | AT4G32810 | CCD8      | carotenoid cleavage dioxygenase 8                                        |
| Potri.007G029300 | AT4G36720 | HVA22K    | HVA22-like protein K                                                     |
| Potri.007G029400 | AT4G36730 | GBF1      | G-box binding factor 1                                                   |
| Potri.007G055900 | AT3G49910 | RPL26A    | Translation protein SH3-like family protein                              |
| Potri.007G057000 | AT4G35987 | CaMKMT    | S-adenosyl-L-methionine-dependent methyltransferases superfamily protein |
| Potri.007G145100 | AT2G31830 | IP5P14    | endonuclease/exonuclease/phosphatase family protein                      |
| Potri.007G145200 | AT1G05640 |           | Ankyrin repeat family protein                                            |
| Potri.007G147100 | AT3G59950 | ATG4B     | Peptidase family C54 protein                                             |
| Potri.007G147200 | AT2G44150 | ASHH3     | histone-lysine N-methyltransferase ASHH3                                 |
| Potri.008G036300 | AT2G39130 | AVT1C     | Transmembrane amino acid transporter family protein                      |
| Potri.008G036400 | AT5G04260 | WCRKC2    | WCRKC thioredoxin 2                                                      |
| Potri.008G036500 | AT3G10360 | APUM4     | pumilio 4                                                                |
| Potri.008G077700 | AT4G20370 | TSF       | PEBP (phosphatidylethanolamine-binding protein) family protein           |
| Potri.008G077800 | AT1G65470 | FAS1      | chromatin assembly factor-1 (FASCIATA1) (FAS1)                           |
| Potri.008G116800 | AT1G68830 | STN7      | STT7 homolog STN7                                                        |
| Potri.008G116900 | AT1G13250 | GATL3     | galacturonosyltransferase-like 3                                         |
| Potri.008G134600 | AT2G01690 | VAC14     | ARM repeat superfamily protein                                           |
| Potri.008G136300 | AT1G68040 |           | S-adenosyl-L-methionine-dependent methyltransferases superfamily protein |
| Potri.008G143700 | AT2G02148 |           | (1 of 1) PTHR13555 - C2H2 ZINC FINGER CGI-62-RELATED                     |
| Potri.008G144000 |           |           |                                                                          |
| Potri.008G159400 | AT3G63410 | VTE3      | S-adenosyl-L-methionine-dependent methyltransferases superfamily protein |
| Potri.008G159500 | AT3G55760 | F1I16_170 |                                                                          |
| Potri.009G016900 | AT1G08420 | BSL2      | BRI1 suppressor 1 (BSU1)-like 2                                          |
| Potri.009G033100 |           |           |                                                                          |
| Potri.009G043800 | AT2G29650 | ANTR1     | phosphate transporter 4;1                                                |
| Potri.010G081300 | AT5G43810 | AGO10     | Stabilizer of iron transporter SufD / Polynucleotidyl transferase        |
| Potri.010G091200 | AT5G19310 | CHR23     | Homeotic gene regulator                                                  |
| Potri.010G091400 | AT5G19300 |           | (1 of 1) PTHR12150:SF13 - DUF171 FAMILY PROTEIN                          |
| Potri.010G092200 | AT5G19210 | RH58      | P-loop containing nucleoside triphosphate                                |

|                  |           |               |                                                                                                                        |
|------------------|-----------|---------------|------------------------------------------------------------------------------------------------------------------------|
| Potri.010G092300 | AT4G14220 | RHF1A         | hydrolases superfamily protein<br>RING-H2 group F1A                                                                    |
| Potri.010G092800 |           |               |                                                                                                                        |
| Potri.010G092900 | AT1G69830 | AMY3          | alpha-amylase-like 3                                                                                                   |
| Potri.010G115200 | AT1G71090 | PILS2         | Auxin efflux carrier family protein                                                                                    |
| Potri.010G115500 | AT1G71110 |               |                                                                                                                        |
| Potri.010G116300 |           |               |                                                                                                                        |
| Potri.010G116400 | AT1G15130 | BRO1          | Endosomal targeting BRO1-like<br>domain-containing protein                                                             |
| Potri.010G138900 | AT1G73430 | COG3          | sec34-like family protein                                                                                              |
| Potri.010G143600 |           |               |                                                                                                                        |
| Potri.010G143700 |           |               |                                                                                                                        |
| Potri.010G144400 | AT3G17030 |               | Nucleic acid-binding proteins superfamily                                                                              |
| Potri.010G144500 | AT3G66654 | CYP21-4       | Cyclophilin-like peptidyl-prolyl cis-trans<br>isomerase family protein                                                 |
| Potri.010G154100 | AT1G26310 | CAL           | K-box region and MADS-box transcription<br>factor family protein                                                       |
| Potri.010G195000 | AT3G55730 | F1I16_140     | myb domain protein 109                                                                                                 |
| Potri.010G209300 | AT5G13660 |               | (1 of 18) PF16135 - TPL-binding domain in<br>jasmonate signalling (Jas)                                                |
| Potri.011G057000 | AT1G28370 | ERF11         | ERF domain protein 11                                                                                                  |
| Potri.011G082800 | AT5G46180 | DELTA-O<br>AT | ornithine-delta-aminotransferase                                                                                       |
| Potri.011G169200 | AT4G26450 | WIP1          |                                                                                                                        |
| Potri.012G062300 |           |               |                                                                                                                        |
| Potri.012G063400 | AT5G08100 | At5g08100     | N-terminal nucleophile aminohydrolases<br>(Ntn hydrolases) superfamily protein                                         |
| Potri.012G063800 | AT5G60850 | DOF5.4        | OBF binding protein 4                                                                                                  |
| Potri.012G064100 | AT4G37120 | At4g37120     | Pre-mRNA splicing Prp18-interacting factor                                                                             |
| Potri.012G064200 |           |               |                                                                                                                        |
| Potri.012G066900 |           |               |                                                                                                                        |
| Potri.012G067000 | AT5G07810 | MXM12.5       | SNF2 domain-containing protein / helicase<br>domain-containing protein / HNH<br>endonuclease domain-containing protein |
| Potri.012G067800 | AT1G74330 |               | Protein kinase superfamily protein                                                                                     |
| Potri.013G004801 | AT5G26749 |               | C2H2 and C2HC zinc fingers superfamily<br>protein                                                                      |
| Potri.013G004901 |           |               |                                                                                                                        |
| Potri.013G005000 |           |               |                                                                                                                        |
| Potri.013G047500 | AT3G04470 |               | Ankyrin repeat family protein                                                                                          |
| Potri.013G047600 | AT5G28960 |               | (1 of 2) PTHR13132 - ALPHA- 1,6<br>-FUCOSYLTRANSFERASE                                                                 |
| Potri.013G056500 | AT3G13540 | MYB5          | myb domain protein 5                                                                                                   |

|                  |           |         |                                                        |
|------------------|-----------|---------|--------------------------------------------------------|
| Potri.013G065700 | AT3G03710 | PNP1    | polyribonucleotide nucleotidyltransferase,<br>putative |
| Potri.013G081300 |           |         |                                                        |
| Potri.014G016900 | AT1G27752 |         | Ubiquitin system component Cue protein                 |
| Potri.014G017000 | AT1G27750 |         | nucleic acid binding                                   |
| Potri.014G028900 | AT5G09890 | MYH9.10 | Protein kinase family protein                          |
| Potri.014G029000 | AT5G42900 | COR27   | cold regulated gene 27                                 |
| Potri.014G140900 | AT5G36880 | ACS     | acetyl-CoA synthetase                                  |
| Potri.014G141000 | AT1G12920 | ERF1-2  | eukaryotic release factor 1-2                          |
| Potri.014G148800 | AT2G32000 |         | DNA topoisomerase, type IA, core                       |
| Potri.015G088900 | AT3G48425 | APE1L   | DNase I-like superfamily protein                       |
| Potri.015G089000 | AT3G48430 | REF6    | relative of early flowering 6                          |
| Potri.015G089300 | AT2G36850 | CALS10  | glucan synthase-like 8                                 |
| Potri.017G129000 | AT5G37850 | PK      | pfkB-like carbohydrate kinase family<br>protein        |
| Potri.018G046700 | AT2G25740 |         | ATP-dependent protease La (LON) domain<br>protein      |
| Potri.018G064700 | AT1G17590 | NFYA8   | nuclear factor Y, subunit A8                           |
| Potri.018G064800 | AT5G20520 | WAV2    | alpha/beta-Hydrolases superfamily protein              |
| Potri.019G068200 |           |         |                                                        |
| Potri.019G068300 |           |         |                                                        |

---
