# Supplementary material for: A Genomic Quantitative Study on the Contribution of the Ancestral-State Bases Relative to Derived Bases in the Divergence and Local Adaptation of Populus davidiana
Source: Genes (Basel). 2023 Mar 29;14(4):821. doi: 10.3390/genes14040821 (PMC10137690; doi:10.3390/genes14040821)
Supplement: Supplementary file 1 [file genes-14-00821-s001.zip › Supplementary Table S2b, S2c.xlsx]

## Sheet: Table S2b
Table S2b. Two-dimensional joint site-frequency spectrum (2D-SFS) of fastsimcoal demographic inferences. “pop0” represents central population, “pop1” represents southwest population, “pop2” represents north population.
pop1_0
1 observation
	d0_0	d0_1	d0_2	d0_3	d0_4	d0_5	d0_6	d0_7	d0_8	d0_9	d0_10	d0_11	d0_12	d0_13	d0_14	d0_15	d0_16	d0_17	d0_18	d0_19	d0_20	d0_21	d0_22	d0_23	d0_24	d0_25	d0_26	d0_27	d0_28	d0_29	d0_30	d0_31	d0_32	d0_33	d0_34	d0_35	d0_36	d0_37	d0_38	d0_39	d0_40	d0_41	d0_42	d0_43	d0_44	d0_45	d0_46	d0_47	d0_48
d1_0	219896906	1829540	848845	528276	364043	264839	199173	158861	126243	104252	86476	71056	58567	50220	44330	36199	30833	29006	23171	20685	16536	15202	12898	11388	9543	8608	7521	6489	5351	4478	4446	3372	3221	2722	2474	1964	1832	1638	1225	976	1125	826	725	566	344	716	293	283	245
d1_1	197295	27672	21412	18683	16347	15760	13362	13948	11401	10221	10352	10580	7987	7983	6827	6279	5681	5459	4794	4668	3816	3689	3308	3015	2631	2873	2591	1595	1941	1720	1604	1216	1497	1091	701	942	874	753	673	559	480	402	408	349	287	299	254	198	155
d1_2	141521	15230	12720	10818	10065	9674	8589	7201	7744	6474	6428	5659	5144	4980	4274	4196	3804	3961	3457	3374	2733	2690	2351	2206	1931	1652	1797	1458	1239	1365	1025	997	1208	911	653	622	708	640	564	492	400	600	385	252	223	222	190	267	108
d1_3	122868	12916	9972	8164	7047	7071	6963	6516	5953	5034	5343	4704	4324	4066	4181	3600	3241	3147	3116	2486	2728	2338	1734	2027	1271	1758	1679	1648	1088	1050	1109	880	819	772	662	651	551	786	565	610	473	436	281	269	273	290	157	195	177
d1_4	104267	9774	9497	7432	6670	6461	5636	5604	5172	5031	4672	3920	4069	3266	3443	3565	2895	2609	2860	2448	2290	2220	1959	1907	1826	1648	1391	1298	1267	1095	1006	1238	1141	806	774	663	771	385	467	339	354	333	242	306	424	193	202	197	81
d1_5	96012	9634	6771	6449	6606	5583	5252	4870	4224	4487	3823	3516	3436	2930	3342	2684	2823	2471	2378	2256	2211	1867	1872	1901	1596	1571	919	1642	997	1073	942	842	770	742	774	708	619	564	449	469	449	342	370	472	396	229	176	188	178
d1_6	89171	8381	6421	5817	5659	5314	4808	5046	4236	3875	4130	3239	3660	3000	2824	2572	2256	2426	2104	2196	1703	1830	1816	1717	1636	1465	1299	1490	1234	982	1077	991	928	774	666	561	618	580	446	430	519	264	267	314	317	229	209	326	168
d1_7	87402	7180	5914	5713	4734	4577	5169	4181	3742	3705	3744	3312	2943	3020	2778	2428	2448	2028	2288	2121	1866	1832	1517	1495	1650	1371	1221	1322	986	961	1104	939	981	696	623	768	604	442	511	454	409	387	388	258	359	267	227	265	335
d1_8	77990	6939	5161	4805	5154	4606	3468	4610	3670	3363	3108	3321	2803	2486	2905	2478	2444	2139	1799	1855	1974	1583	1578	1479	1435	1198	1412	1248	973	1371	975	835	970	959	672	698	525	684	572	447	551	332	322	254	345	254	311	175	266
d1_9	69521	5982	5030	4827	4617	4949	3694	3908	3325	2949	3199	3023	2834	2725	2202	2344	2373	2087	1956	1895	1833	2134	1810	1549	1295	1381	1265	1446	1083	1271	860	896	732	835	724	654	623	662	594	642	644	451	510	306	438	233	242	250	290
d1_10	68382	6607	4431	3997	4197	3637	3878	3745	3231	3770	3031	2775	2415	2772	2237	2261	2196	2232	1948	1659	1683	1745	1678	1528	1419	1186	1293	1459	1095	919	1165	852	832	702	748	556	681	594	613	676	851	348	463	550	358	329	196	226	162
d1_11	65823	5493	4943	3294	3983	3605	3444	3294	2974	2758	2912	2469	2346	2501	2533	1947	2226	2048	2222	1775	1445	1693	1413	1396	1425	1434	1277	1045	1141	938	980	825	703	779	869	572	628	621	659	554	546	359	372	357	333	342	237	284	343
d1_12	59582	5326	3898	3817	3875	3398	3461	3032	2719	2977	2610	2468	2593	2236	2266	2092	1932	1729	1813	1781	1695	1596	1532	1429	1355	1328	1325	1340	1125	1084	1092	992	748	800	714	1005	698	739	647	534	460	532	517	399	327	370	407	308	212
d1_13	57583	4868	4165	3765	3538	3187	2693	3155	2799	2742	2393	2684	2297	2752	2326	2132	2078	1704	1655	1962	1764	1397	1259	1359	1459	1090	1464	1096	1110	1128	1008	891	751	870	616	592	809	590	602	590	567	495	374	453	380	223	452	233	307
d1_14	53029	4628	4534	3766	3368	3168	3072	2925	2920	2454	2512	2160	2243	1884	2226	1871	1718	1780	1542	1821	1457	1505	1724	1619	1314	1289	1212	1406	972	1096	890	981	921	932	807	917	646	728	610	527	455	327	449	447	442	520	303	282	200
d1_15	50578	4599	3004	3077	2961	2543	3287	2957	2315	2364	2731	2162	2214	2050	2076	1955	2106	1814	1872	1965	1715	1393	1507	1507	1333	1100	1232	1431	1066	879	1084	1056	940	1007	851	919	759	752	500	600	600	732	389	406	472	606	407	302	433
d1_16	46599	3490	3125	2926	2826	2647	2566	2379	2358	2473	2121	2403	2040	2077	2065	2040	2400	1704	1627	1497	1662	1524	1901	1553	1340	1538	1216	1043	1175	990	1122	979	1072	761	826	703	860	728	534	447	615	601	502	452	474	360	477	297	207
d1_17	43417	3973	3960	3183	2496	2438	2776	2669	2008	2421	2385	2004	2337	1877	1833	2062	1653	1833	1897	1420	1557	1370	1547	1484	1654	1643	1239	1055	1077	1019	1098	874	782	1022	860	844	788	801	649	485	704	360	649	409	384	384	369	462	443
d1_18	38320	3581	3252	2371	2586	2415	2398	2229	2481	1918	2193	2265	2254	1816	1966	1926	1603	2044	1692	1573	1764	1424	1353	1452	1362	1209	1050	1287	1181	1128	914	897	1034	887	790	880	724	733	574	640	528	583	464	411	474	375	445	332	617
d1_19	37535	3635	3109	2664	2298	2154	2488	2508	1957	2227	2157	1555	2113	1918	1613	1602	1616	1594	1449	1458	1433	1254	1580	1462	1332	1225	1203	1272	1145	1107	877	1072	1072	865	726	1016	781	688	613	515	726	612	726	497	626	461	421	437	384
d1_20	34826	3851	2404	2223	2489	2470	2479	2077	2315	1874	1936	2283	2183	1970	1591	1726	1797	1388	1536	1882	1180	1182	1396	1303	1155	1123	1462	1145	1031	1123	902	1181	855	898	933	857	741	629	741	672	647	608	369	450	377	359	545	474	555
d1_21	34287	2878	3110	2487	2757	2470	2183	2222	2372	2207	1791	2049	1658	1588	1702	1581	1409	1455	1409	1558	1559	1263	1396	1228	1110	1294	1128	1104	978	1076	1093	1056	1131	801	799	813	944	949	723	602	362	424	428	442	427	672	365	615	555
d1_22	31532	2811	3201	2148	1990	2068	1656	1774	2957	1561	1942	2230	1529	1815	1605	1891	1535	1576	1253	1418	1217	1334	1305	1216	1383	1238	1082	1363	1394	1015	900	980	701	887	940	1081	715	878	732	715	705	851	688	455	490	399	591	390	665
d1_23	30380	2754	2297	1993	2241	1730	1916	1846	1663	2059	2439	1403	1937	1609	1504	1393	1615	1642	1619	1274	1645	1243	1278	1289	1140	1293	942	971	1102	1036	1057	1032	854	900	822	868	679	835	591	793	638	820	860	523	802	538	455	369	493
d1_24	26150	2686	2448	1927	1873	1989	1870	1884	1747	1768	1520	1472	1950	1664	1454	1562	1544	1263	1497	1298	1545	1180	1462	1162	1364	1269	1334	1310	855	1072	1088	763	984	844	966	1172	924	805	908	894	516	698	644	560	721	492	379	517	392
d1_25	25974	2584	2312	1994	2056	1915	1476	1876	1535	1755	1745	1508	1312	1810	1738	1335	1472	1338	1766	1475	1298	1323	1098	1163	1190	1282	1437	1202	1040	986	941	1114	1108	850	857	892	814	772	882	960	766	881	704	471	566	630	466	628	483
d1_26	24453	2210	1798	2119	2038	1548	1539	1526	1535	1522	1429	1633	1969	1660	2140	1383	1488	1451	1530	1419	1229	1488	1486	1305	993	1112	1037	1195	1114	1158	1145	1243	799	886	802	964	723	937	791	605	613	846	666	640	581	904	447	706	560
d1_27	21847	1930	2044	1507	1527	2071	1460	1457	1711	1578	1650	1461	1453	1615	1200	1603	1316	1202	1505	1309	1157	1041	1311	1142	1028	1322	1119	914	1208	1364	1245	950	1082	949	931	763	767	862	753	607	855	782	698	774	477	505	604	921	717
d1_28	20144	1818	1835	1514	1220	1730	1522	1292	1424	1526	1155	1343	1367	1298	1390	1457	1630	1249	1227	1155	1463	1604	1045	1073	1084	949	1013	1291	1219	996	962	1114	927	872	881	794	831	850	928	653	632	668	545	845	667	742	578	549	748
d1_29	19090	1882	1309	1533	1653	1144	1446	1299	1883	1197	1466	1389	1605	1488	1351	1427	1247	1044	1210	1366	1402	1264	1042	1199	1094	984	1133	985	1254	1132	1034	1096	939	929	994	927	1020	889	825	889	656	767	597	1029	739	629	592	524	606
d1_30	17483	1578	1233	1339	1403	1912	1218	1264	1258	1435	1147	1284	1088	1184	1112	1393	1340	1126	1300	1204	1148	1052	1228	1186	1168	971	1303	1348	861	1080	1010	931	985	776	897	768	790	897	882	1061	885	1020	901	718	829	538	770	608	500
d1_31	17106	1791	1440	1173	1393	1042	1448	1308	1427	1032	1328	1035	1278	1177	1216	1045	1425	1141	1275	1145	1124	1341	967	1326	783	1465	1136	1083	841	927	740	1009	1055	1263	627	1042	770	844	765	870	787	730	980	677	720	640	670	481	607
d1_32	13707	1815	1453	1193	1405	1256	945	1436	1234	1011	1068	1130	1303	1050	1095	1180	1362	1246	1320	1383	1176	1210	996	1123	1111	992	1125	913	1090	1123	938	1108	1097	790	883	1058	1013	789	704	761	853	809	989	812	670	666	529	650	530
d1_33	14438	1172	1315	1349	827	1320	1151	1117	927	1184	1080	1114	1156	1052	1130	1466	1187	1172	1153	1246	1069	1166	1064	1111	1165	949	1101	980	987	1124	1244	1016	859	810	819	876	706	913	1020	1037	680	707	843	851	752	862	928	707	894
d1_34	13861	1322	1273	1242	797	1026	831	1266	1130	1036	1416	1079	1054	1241	1043	1235	962	925	983	975	1256	1241	1094	951	991	1082	951	1206	934	1057	1106	1093	804	995	958	811	777	1262	1046	886	741	710	1048	903	778	709	703	810	511
d1_35	11880	1253	943	876	1003	958	973	874	1076	734	1183	1386	1057	983	791	1161	1115	1058	1119	811	1100	1254	948	1046	965	902	1121	995	1079	1226	1061	1059	1039	1062	802	895	1017	821	791	884	1011	804	742	1037	585	880	825	881	673
d1_36	11338	1215	953	847	867	1027	1067	725	995	888	974	1109	933	1326	1088	1075	1036	1164	970	959	1047	1040	828	992	937	858	911	1155	1154	1136	947	1019	971	885	640	993	1120	1127	817	975	870	855	940	869	1320	956	1104	839	724
d1_37	10232	955	988	652	943	1101	827	955	788	969	948	1029	927	1020	949	927	1102	1135	872	1165	1102	999	998	1045	912	950	1092	1137	857	929	934	1016	1172	1049	809	839	743	919	1009	1128	1358	812	843	786	1059	1130	585	701	974
d1_38	9011	911	1174	820	927	782	572	1041	1091	894	870	869	732	810	1154	965	1019	913	777	1080	1050	1032	1153	1344	1112	991	1048	778	1035	935	947	1119	986	1093	1076	806	1000	780	1042	827	937	716	826	894	868	792	1160	684	693
d1_39	6840	782	753	743	964	772	1115	927	821	927	937	668	751	813	1130	805	1120	942	794	1018	789	1007	716	972	945	905	1016	1002	1028	940	935	847	870	979	833	953	1020	752	1028	816	1008	966	903	695	867	732	1080	613	1567
d1_40	7335	763	653	791	649	801	895	641	686	736	958	684	869	669	694	710	881	1124	919	891	952	1001	903	1119	869	966	804	905	909	939	1206	1036	870	922	991	855	876	824	843	851	651	932	935	1086	813	1010	647	1156	1087
d1_41	6178	754	561	512	578	652	898	568	727	682	848	841	735	957	703	631	732	698	707	807	964	1017	1044	806	812	876	994	1006	1040	914	884	915	847	940	635	793	987	836	1008	1056	972	845	785	817	878	666	791	1145	747
d1_42	5824	685	763	645	519	558	455	918	676	717	841	794	775	700	697	691	634	678	816	735	838	743	766	958	1034	827	799	1056	887	896	918	1038	1122	785	896	1078	886	726	644	1158	1048	749	1036	951	723	950	1092	1191	877
d1_43	5602	763	475	559	599	640	500	646	709	587	704	743	856	707	868	765	916	746	1003	729	824	835	877	1075	699	760	1077	1040	645	932	869	939	1007	852	935	978	1096	697	1011	739	821	1029	747	794	763	1038	866	609	1061
d1_44	5264	541	396	469	548	394	709	461	618	683	904	572	915	611	674	594	583	759	696	826	792	843	820	982	868	879	1065	757	836	877	850	1072	658	849	965	920	849	835	1312	915	1017	1203	870	927	1035	695	1138	1083	1039
d1_45	5312	626	493	466	483	359	466	479	584	549	652	632	619	547	549	592	831	599	933	544	741	863	803	782	841	934	751	786	914	811	914	825	1004	1512	1263	982	1070	929	930	811	1152	1074	900	1218	902	763	1138	1000	1037
d1_46	4268	485	409	384	381	419	570	439	467	600	463	575	683	614	677	650	638	658	710	643	574	871	906	788	801	762	915	979	951	806	966	730	861	1184	926	1124	1153	1066	918	850	998	925	1466	1210	968	969	809	1071	827
d1_47	3430	467	316	455	410	483	528	473	377	440	583	560	634	757	612	563	530	891	696	745	622	818	772	815	840	899	871	922	823	650	710	1002	1020	761	796	1094	1041	802	1004	1313	1010	988	1126	981	980	891	1169	1007	1268
d1_48	3207	512	305	336	388	429	315	405	339	334	431	481	469	712	520	582	558	448	548	685	689	693	585	878	780	807	686	834	738	802	631	1058	857	886	856	1103	1177	801	747	1057	794	1019	978	894	1105	735	1112	819	1122
d1_49	3137	371	329	271	313	483	305	470	483	447	508	467	719	336	480	582	436	552	592	609	667	524	798	557	767	658	618	774	786	858	791	760	1165	801	988	882	853	725	988	1129	700	747	1070	963	1349	1372	898	1348	825
d1_50	2465	651	396	310	529	481	519	338	542	381	330	459	494	418	405	621	669	614	505	544	733	675	706	953	699	757	607	754	887	821	848	1073	886	906	883	836	805	887	944	850	926	839	926	1049	992	844	1174	1059	1124
d1_51	2133	347	375	365	476	393	252	263	422	424	513	424	297	506	556	511	497	427	663	581	650	595	672	585	689	655	619	648	791	614	786	669	853	926	955	858	851	1073	755	1033	1296	1036	1074	962	1109	1243	1094	920	1422
d1_52	2381	303	371	434	268	247	286	270	365	379	316	377	293	517	466	632	658	419	911	697	644	524	597	573	607	620	832	659	952	693	820	945	837	842	965	811	968	881	835	802	913	1144	925	1144	1010	1359	963	1125	1311
d1_53	2113	347	256	247	231	329	271	420	513	356	405	314	348	339	505	383	636	476	700	694	571	627	635	566	618	583	591	713	665	911	689	1060	838	819	828	957	1180	1293	949	939	932	951	1077	981	983	1172	1249	1228	1398
d1_54	2155	167	185	195	163	172	201	292	140	289	356	247	413	359	365	369	433	345	594	414	527	531	499	698	550	734	743	637	717	1024	668	855	832	668	831	859	833	908	1111	837	845	983	1249	1084	1444	956	1054	1571	1232
d1_55	1077	152	222	161	223	238	129	279	218	211	435	331	320	363	398	331	548	419	484	433	470	445	529	607	523	641	742	759	817	688	705	815	752	814	1122	764	964	915	997	1067	1172	805	1058	1282	1231	1383	1044	1332	1643
d1_56	772	238	133	132	440	141	183	221	297	202	272	326	265	295	319	274	353	326	459	431	392	498	579	490	555	583	626	665	853	623	794	1101	680	844	902	783	1033	1061	768	1305	1000	1096	1076	1195	1325	1193	1538	1309	1803
d1_57	487	106	146	94	166	207	249	109	188	206	241	316	278	321	391	468	402	371	486	375	368	433	558	686	593	563	562	609	602	663	672	956	516	821	1037	1030	997	880	1006	933	1116	1128	1349	948	1425	1113	1119	1390	1281
d1_58	515	75	84	96	97	279	142	203	195	170	204	310	317	233	518	330	253	424	313	373	446	414	666	490	712	646	880	964	664	719	708	782	779	1043	1048	1060	1061	1187	1127	1153	1405	1049	1404	1492	1560	1117	1833	1388	1864
d1_59	688	62	96	77	88	109	241	108	160	230	184	226	250	312	277	293	272	467	371	540	501	653	483	476	550	524	544	636	769	563	651	1212	985	953	608	1054	830	1225	1568	1034	1474	1550	1374	1252	1876	1706	1766	1865	2201
d1_60	953	75	79	103	70	169	128	158	131	145	142	274	205	173	263	264	358	493	392	353	558	464	523	527	506	604	946	601	585	815	628	692	1017	831	1047	1130	1265	1313	1362	1499	1523	1904	1433	1740	1476	1933	1791	2123	2425
d1_61	343	57	62	68	124	139	144	129	130	165	205	239	325	266	300	279	436	363	509	387	490	559	575	604	464	704	926	788	1038	1085	895	734	1358	1472	1172	1533	1631	1599	1390	2345	1720	2263	2022	2404	2517	3118	2728	4447	3843
d1_62	312	74	95	120	147	159	147	120	186	179	250	297	335	730	362	550	639	685	820	616	872	1139	1141	1437	1436	1641	1835	1753	2515	2259	2405	3081	3282	3900	4041	4504	5212	6389	6057	8022	8747	11556	10458	12506	15786	16046	18409	22538	26872
pop2_0
1 observation
	d0_0	d0_1	d0_2	d0_3	d0_4	d0_5	d0_6	d0_7	d0_8	d0_9	d0_10	d0_11	d0_12	d0_13	d0_14	d0_15	d0_16	d0_17	d0_18	d0_19	d0_20	d0_21	d0_22	d0_23	d0_24	d0_25	d0_26	d0_27	d0_28	d0_29	d0_30	d0_31	d0_32	d0_33	d0_34	d0_35	d0_36	d0_37	d0_38	d0_39	d0_40	d0_41	d0_42	d0_43	d0_44	d0_45	d0_46	d0_47	d0_48
d2_0	218995210	1520711	673935	391877	247383	162289	116097	83358	60102	44851	34385	25427	19220	13901	11249	7913	6818	4830	3386	2878	3057	1582	1498	977	860	664	470	340	251	279	141	122	76	57	38	24	26	42	94	8	7	10	1	2	0	0	0	0	0
d2_1	672325	92226	66342	50665	40854	35592	27811	23233	20771	16516	15498	12450	9362	8089	7349	5829	4388	4048	2791	2328	1872	1653	1486	913	901	662	501	424	292	340	285	112	98	55	93	31	42	54	31	35	11	21	11	13	6	1	0	1	0
d2_2	450857	62427	40506	33068	29368	25010	20070	16766	14642	12973	11206	9177	7689	6698	5644	4746	4441	3502	3014	2082	1771	1811	1304	1149	864	948	851	625	342	380	247	323	274	106	97	225	99	54	23	36	29	7	8	1	5	7	14	2	0
d2_3	350403	51992	32589	26105	23609	20164	17214	15114	13235	10531	10024	8159	7811	6203	5242	4723	4312	3366	3388	2331	2402	1873	1449	1273	1044	1054	596	850	439	448	464	534	370	259	143	130	74	39	50	58	56	32	15	9	7	22	3	0	7
d2_4	276011	45569	27286	22692	20562	17474	14634	13950	11809	10195	9700	8462	7049	6267	5565	4726	4126	3255	3197	2884	2250	1990	1965	1565	1375	875	1026	935	635	601	379	559	230	212	186	152	106	160	57	67	42	10	19	11	10	34	2	5	3
d2_5	219610	38211	24757	19785	17565	14545	13884	12982	11445	10742	9227	7531	7784	6100	5294	4967	3781	3892	3076	2953	2155	2174	1549	1781	1525	1120	1069	733	757	460	480	385	260	314	224	89	241	85	86	96	94	59	11	10	44	1	6	1	9
d2_6	179389	33014	20847	17706	14859	13968	12102	11355	9384	8903	7457	6451	6532	5685	5137	4457	4187	3265	3362	3336	2499	2257	1662	1592	1280	1178	1088	1045	1137	693	587	483	478	297	228	190	345	291	102	131	53	40	53	41	95	22	21	16	5
d2_7	145686	27840	17736	14351	13225	12445	11929	10169	9385	8649	8000	7769	6036	5895	5323	4526	3953	3831	3235	3052	2568	2272	1947	1770	1653	1359	1097	1130	778	727	492	507	469	513	338	374	225	306	153	141	55	94	45	50	43	26	18	7	2
d2_8	116232	24596	16042	12926	11696	11722	9397	9506	8712	8713	6539	6911	6616	5853	5412	4419	4255	3307	3489	3055	2341	2415	2307	1909	1727	1527	1289	1169	898	816	873	560	463	444	517	309	259	155	211	139	145	92	87	107	55	59	27	26	11
d2_9	91323	19859	13737	10951	10676	10909	9275	8588	8068	7043	7444	6984	6080	5363	5113	4649	4393	4443	3212	3184	2718	2392	2184	2221	1827	1678	1582	1471	1372	899	889	648	701	498	512	351	333	259	213	324	151	151	90	91	86	70	29	15	12
d2_10	73533	18531	11125	9344	9110	8013	8134	7965	7078	6689	6669	5981	5354	5201	5045	4645	3475	3684	3503	2922	2555	2484	2153	2178	2023	1822	1447	1160	1206	1111	892	828	627	472	471	546	410	275	188	202	180	274	195	106	102	50	41	22	46
d2_11	59298	14654	10438	8627	9707	7928	7056	7762	6438	6398	6215	5947	5530	4947	4681	3978	4059	3831	4211	3123	2852	2875	2670	2103	1891	1808	1494	1567	1139	1053	907	851	711	585	464	547	380	311	235	298	211	207	95	99	248	49	56	72	42
d2_12	49490	13386	9236	7867	6927	6887	5483	6711	6429	5800	5268	5271	5333	4502	4182	4272	4086	4046	3723	3583	2700	3219	2477	2287	1861	1912	1851	1676	1386	1247	1338	882	847	756	556	520	376	327	302	222	217	237	163	121	77	78	89	43	76
d2_13	39736	10469	6893	5927	6336	6737	5817	5798	6004	5401	6130	5147	4623	4978	4623	4161	3826	3595	3379	3265	2731	2648	2573	2334	2261	1673	1807	1572	1370	1170	991	1010	1113	911	695	671	574	540	505	349	245	274	169	173	123	111	59	73	54
d2_14	31227	9773	6773	5142	5233	5231	5056	4876	4823	4602	5225	4505	4332	4348	4592	3832	4034	4127	3556	3132	3502	2672	2272	2869	2097	2179	1578	1779	1434	1404	1303	1135	957	821	699	770	532	463	409	361	372	232	230	154	125	138	113	125	93
d2_15	22664	7498	5391	4912	4832	4999	4404	4510	4325	4373	4754	4416	4353	4430	3839	4038	3636	3610	3560	3033	2902	3101	2590	2667	2094	2055	1682	1571	1685	1420	1343	1448	995	955	720	565	851	736	425	506	404	524	278	187	202	158	152	116	98
d2_16	20767	5955	4041	4165	4302	4650	4289	4983	4408	3844	4318	3898	3802	4375	3487	3576	3213	3629	3473	3214	3154	2545	2713	2522	2422	2149	2184	1883	1683	1658	1350	1251	1396	1123	800	736	905	592	544	569	492	280	214	213	189	201	223	101	89
d2_17	15468	6136	3458	4210	3725	3856	3609	3675	3596	3662	3717	3618	3894	3791	3941	4054	3432	2831	3038	3118	2606	3069	2253	2537	1987	2240	2139	1811	1679	1307	1225	1495	1297	1000	890	785	1051	719	746	540	478	317	392	277	353	186	201	139	119
d2_18	12285	4801	3497	2699	3066	3566	3546	3116	3865	3429	3781	3539	3514	3364	3062	3272	3743	3502	3131	2890	2929	2911	2584	2430	2437	1981	2128	1858	1883	1581	1472	1323	1499	1199	987	817	825	753	646	580	541	443	353	366	236	208	121	150	126
d2_19	9017	3417	2648	3090	3016	2880	3065	3028	2837	3035	3970	3252	3099	3254	3058	2993	3163	2709	3185	2892	2779	3037	2760	2595	2621	1955	2466	1965	1912	1631	1973	1634	1502	1521	1074	872	1004	824	607	974	507	431	523	350	307	229	203	224	163
d2_20	8052	2677	2597	2691	2426	2610	2649	2721	2536	2855	2971	3402	2684	3056	2712	3006	2928	2801	2525	2991	2618	2515	2260	2281	2210	2152	2016	1973	1866	1711	1505	1433	1551	1193	1211	991	1251	729	771	791	637	548	297	454	371	238	308	259	162
d2_21	6176	2259	1697	1825	2143	2218	2177	2529	2577	2871	2551	2559	2706	2755	3088	3063	3098	2986	2855	2339	2474	2556	2365	2281	2097	2669	2144	2076	1971	1877	1665	1556	1229	1397	1317	1242	1010	911	915	1034	668	608	517	621	413	700	260	259	129
d2_22	4523	1890	1785	1638	1631	1939	1949	2098	2291	2176	2308	2330	2498	2299	2851	2866	2396	3217	3051	2684	3102	2540	2720	2405	2456	2354	2228	2140	1846	1755	1784	1437	1624	1549	1199	1546	971	1060	1073	809	640	529	687	573	429	400	347	318	224
d2_23	3756	1608	1508	1402	1280	1506	1984	2091	1932	2389	2375	2271	2662	2617	2447	2644	2782	2564	2717	2471	2491	2438	2445	2107	2284	2209	2137	2107	1660	1774	1686	1553	1774	1346	1270	1253	1286	1349	1006	909	686	842	784	503	450	528	451	353	257
d2_24	2882	1555	1537	1218	1230	1508	1520	1628	1774	2100	1858	2249	2089	2330	2344	2102	2460	2383	2096	2266	2336	2114	2190	2400	2573	2088	2113	1889	1820	2020	2038	1795	1399	1499	1224	1239	1174	1153	1380	1093	788	632	701	757	808	554	495	318	361
d2_25	2006	1256	808	1083	1003	1251	1505	1550	1402	1608	1554	1988	1713	2108	1985	2255	2599	2409	2295	2320	2032	2358	2601	2127	2001	2190	2354	2167	2085	1810	1799	1841	1268	1811	1547	1775	1390	1422	985	822	1071	935	638	763	614	607	401	449	240
d2_26	1770	778	868	725	765	1180	1149	1577	1800	1367	1590	1522	1814	1984	2063	1897	2112	1977	1874	2196	2283	2119	2165	2326	1834	1956	2291	2304	1806	2148	1837	1613	1767	1527	1403	1608	1146	963	1404	872	1055	871	1003	651	680	576	674	426	263
d2_27	1208	597	826	714	865	892	1246	972	1244	1508	1123	1572	1535	1802	1883	1826	1854	2099	2024	2190	2079	2165	2110	2348	1935	1934	2040	2130	1694	1868	1745	1833	1559	1424	1526	1408	1392	1039	1330	1238	1128	1094	1057	686	889	584	631	539	549
d2_28	871	506	477	622	535	751	866	1230	1129	1106	1130	1590	1269	1695	1776	1669	1757	1967	1947	1876	1851	1778	2021	1861	1903	2009	1886	1876	1829	1958	2061	1913	1681	1495	1549	1356	1490	1202	1075	1166	926	849	1020	1093	838	745	525	520	392
d2_29	638	366	531	403	494	572	711	1283	973	991	1456	1239	1359	1232	1558	1641	1513	1689	2029	2071	1765	1812	1866	1897	1839	1955	1823	2051	1706	1922	1994	1586	1966	1658	1536	1616	1596	1427	1448	1385	1262	971	891	961	884	836	737	615	633
d2_30	354	452	304	406	498	578	639	731	799	939	938	1069	1327	1253	1559	1381	1515	1471	1743	1775	1759	1782	1718	2027	2163	1720	1907	1756	1573	2040	1650	1744	1846	1537	1769	1844	1541	1615	1429	1421	1377	1114	1093	968	1109	742	918	725	609
d2_31	357	300	350	362	368	433	529	765	660	710	908	1082	1054	1223	1210	1412	1230	1234	1542	1616	1735	1710	1724	1774	1567	1795	2074	1696	2064	1989	1560	1626	1599	1890	1583	1701	1471	1290	1316	1647	1660	1300	1060	1142	1053	807	788	707	1076
d2_32	295	216	157	340	300	438	422	484	761	800	633	744	755	969	1114	1442	1273	1043	1299	1428	1329	1381	1527	1550	1727	1527	1596	1927	2197	1990	1636	1774	1557	1770	1492	1649	1595	1405	1434	1447	1477	1460	1208	999	1238	1165	717	1049	622
d2_33	251	221	219	265	341	372	293	583	524	548	775	732	947	759	1058	892	1333	1372	1328	1396	1380	1259	1503	1461	1610	1437	1554	1697	1530	1722	1523	1798	1649	1555	1581	1922	1687	1621	1471	1760	1360	1551	1205	1237	1252	1199	909	956	582
d2_34	241	152	139	176	262	256	308	412	531	483	452	556	800	744	934	792	1200	1134	1290	1129	1386	1180	1211	1657	1363	1522	1562	1576	1627	1813	1541	1961	2009	1722	1498	1839	1854	1497	1746	1460	1119	1429	1372	1285	1229	1249	1139	691	878
d2_35	105	74	71	211	335	245	299	417	303	432	392	550	552	762	770	781	795	923	1220	936	1081	1544	1452	1792	1322	1767	1316	1744	1598	1405	1742	1823	1802	1770	1435	1637	1976	1781	1248	1697	1614	1643	1774	1558	1331	1218	857	1296	755
d2_36	79	78	111	159	170	250	329	225	327	419	490	497	563	660	989	782	783	703	881	1115	1409	1111	1251	1259	1050	1304	1283	1551	1792	1606	1546	1715	1555	1741	1910	1707	1491	1600	1464	1532	1421	1533	1605	1224	1484	1424	1061	1285	938
d2_37	54	84	88	129	137	131	198	262	247	303	328	397	486	619	549	613	848	907	724	944	1041	1266	1096	1125	1095	1201	1662	1278	1522	1337	1264	1559	1491	1802	1687	1445	1673	1646	1733	1558	1717	1578	1774	1476	1309	1586	1621	1239	1310
d2_38	35	28	89	66	117	113	117	318	260	260	332	428	362	495	528	638	657	585	722	783	1010	1013	868	1394	1073	1367	1441	1187	1451	1420	1349	1584	1472	1724	1804	1574	1872	1622	2244	1699	1839	1783	1287	1622	1745	1128	1383	1250	1295
d2_39	12	43	28	53	105	156	125	169	175	387	182	270	317	671	463	523	578	598	551	1006	993	808	820	1271	995	1188	925	1265	1232	1409	1445	1447	1411	1952	1554	1438	1563	1650	1574	1343	1691	1874	1818	1863	1922	1445	1288	1257	1093
d2_40	11	29	20	48	72	52	65	164	303	196	253	232	398	314	386	437	363	629	569	708	678	736	1237	795	966	931	1179	1212	1022	1233	1421	1407	1287	1448	1397	1375	1454	1662	1482	1878	1236	1628	1659	1692	1430	1610	1237	1900	1496
d2_41	23	10	46	59	77	101	121	154	128	165	147	256	235	222	299	394	510	421	504	811	654	806	865	799	792	1229	1290	1207	1351	1176	1304	1515	1860	1093	1798	1498	1737	1911	1773	1692	1863	1407	1688	1400	1435	1679	1586	1386	2153
d2_42	72	8	37	34	35	27	58	57	84	198	175	118	144	223	244	374	346	403	445	517	526	561	720	662	715	915	1104	967	1023	1023	1231	1322	1429	1090	1567	1496	1559	1602	1508	1585	1894	1991	2228	1621	1672	1487	1570	1693	1906
d2_43	10	4	18	29	15	29	42	96	66	109	124	135	202	194	320	277	440	278	361	494	606	524	686	567	669	757	872	1068	856	895	939	1265	1430	1522	1272	1440	1293	1951	1297	1641	1636	1456	1707	2343	1994	1809	1682	1690	1576
d2_44	2	0	11	9	31	43	25	67	58	126	74	81	208	205	226	221	181	301	501	510	445	477	665	524	560	818	884	908	960	1130	924	1056	1355	1559	1399	1355	1623	1370	1694	1786	1741	1997	1504	1685	1576	2117	1402	1582	2056
d2_45	13	1	8	7	8	16	21	58	40	79	98	103	180	127	155	148	249	444	391	366	299	510	604	403	554	661	584	973	838	858	1146	996	849	1219	1027	1425	1438	1880	1562	1583	1878	1761	1651	1972	1753	2199	1874	2005	2131
d2_46	1	7	18	14	15	10	17	25	47	60	121	103	91	146	141	137	182	192	263	205	289	356	425	580	559	569	675	706	727	874	926	979	779	1176	1027	1656	944	1175	1956	1488	1780	2192	2065	1700	2396	1849	1793	2052	2221
d2_47	1	3	5	3	5	30	29	17	59	31	67	62	67	107	136	144	147	285	180	250	376	533	415	478	498	680	769	689	542	755	694	871	1060	767	1179	1330	1277	1324	1275	1627	1619	1683	1625	2100	1971	2366	1714	2291	3095
d2_48	2	0	8	0	5	25	20	9	26	33	32	23	79	91	58	65	101	171	133	141	144	218	264	448	328	437	511	559	830	699	716	1135	956	1074	775	1092	1278	1681	1241	1840	1736	2008	1663	1764	1862	1680	2207	2202	2075
d2_49	0	0	9	5	6	12	2	10	21	27	32	53	46	51	229	49	76	189	144	198	134	211	210	362	263	323	473	504	528	541	535	822	745	765	905	935	1344	1584	1321	1448	2182	1609	1727	1550	1727	1830	2191	2358	2471
d2_50	0	0	0	6	4	0	116	10	29	42	43	29	44	96	52	89	111	213	95	157	97	153	241	359	326	214	438	512	492	447	590	520	806	1101	1005	1003	917	1323	1001	1204	1672	1753	1104	2048	2250	2080	2079	2237	2830
d2_51	0	0	0	0	3	0	0	11	4	15	22	27	26	63	56	68	74	93	114	170	102	124	188	214	309	282	395	274	438	440	682	885	868	797	856	1084	1052	1127	966	1374	1310	2223	1908	1920	2254	2021	2349	3022	3157
d2_52	0	0	0	0	1	17	0	16	32	25	17	35	8	16	40	58	32	51	84	99	125	117	91	224	372	243	227	272	522	440	515	610	618	684	708	811	1026	1055	915	1247	1594	1346	1729	1596	2493	2396	2587	2518	1938
d2_53	0	0	0	0	0	1	1	15	3	18	3	4	10	14	29	13	46	67	46	82	95	200	128	236	114	301	239	211	208	335	257	541	435	577	789	813	782	949	989	1354	1163	1476	1437	1483	1946	2418	2152	3265	3062
d2_54	0	0	0	0	0	11	0	1	12	29	1	19	14	14	96	17	11	59	46	86	50	181	237	77	116	167	209	256	368	376	742	501	425	425	496	568	472	970	942	1637	1287	997	1677	1603	1726	1763	2152	1910	2370
d2_55	0	0	0	2	0	0	0	13	1	0	5	3	6	6	35	4	16	36	24	28	57	51	152	53	79	145	66	194	192	187	354	228	496	400	692	848	488	948	735	1151	1014	1686	1277	1879	1982	2173	3296	2608	3319
d2_56	0	0	0	0	0	0	0	0	0	8	2	0	5	6	7	7	9	1	34	36	37	87	60	52	68	73	70	363	181	247	273	468	475	284	631	778	950	771	788	1110	1265	1169	1618	1607	1961	2293	2510	3117	3450
d2_57	0	0	0	0	0	0	0	1	0	2	0	0	0	2	1	3	5	13	15	31	6	14	45	39	66	161	195	341	213	179	98	407	171	498	360	460	504	628	788	539	1285	1209	1341	1700	1461	1828	2828	2727	3355
d2_58	0	0	0	0	0	0	0	0	0	0	0	2	7	0	0	0	6	0	10	2	9	4	16	194	24	25	168	161	118	163	131	295	433	415	260	340	473	641	458	434	1022	1327	1633	1511	1822	2159	2200	2946	3560
d2_59	0	0	0	0	0	0	0	0	0	0	0	11	0	0	0	2	2	16	1	9	19	8	21	12	19	3	38	18	120	140	69	103	192	206	272	300	583	554	591	562	791	1452	1255	2028	2749	2422	2781	4352	5840
d2_60	0	0	0	0	0	0	0	0	0	0	0	0	0	0	0	0	1	0	0	0	61	15	6	8	6	4	47	43	15	115	67	114	125	222	247	294	550	397	1364	820	814	1362	2116	2019	3400	3389	5695	7388	9683
pop2_1
1 observation
	d1_0	d1_1	d1_2	d1_3	d1_4	d1_5	d1_6	d1_7	d1_8	d1_9	d1_10	d1_11	d1_12	d1_13	d1_14	d1_15	d1_16	d1_17	d1_18	d1_19	d1_20	d1_21	d1_22	d1_23	d1_24	d1_25	d1_26	d1_27	d1_28	d1_29	d1_30	d1_31	d1_32	d1_33	d1_34	d1_35	d1_36	d1_37	d1_38	d1_39	d1_40	d1_41	d1_42	d1_43	d1_44	d1_45	d1_46	d1_47	d1_48
d2_0	220411225	193433	141908	124447	107076	100023	93729	89568	80939	72588	71142	67415	62134	59693	55232	50806	47660	45159	40270	38892	36824	36873	31738	31443	27652	26630	25820	23350	20387	20658	18386	18734	14316	14023	14738	11880	11354	10617	9847	7919	7587	6875	6059	5807	5256	5106	4604	3502	3490
d2_1	921427	21894	13795	10855	10059	8718	8472	7835	7801	5868	5957	5941	5817	5233	5107	4828	4370	4489	4268	3896	3265	3826	3563	4022	3579	3633	2534	3131	2094	2353	2609	1956	1957	2145	1622	1857	1556	1290	1151	1225	1163	796	1069	840	1156	800	700	820	455
d2_2	617795	19117	10924	8677	7941	7141	5687	5597	5134	5517	4639	4741	4020	4319	4292	3872	3264	3056	3198	2913	2923	2479	2819	2093	2005	1942	2014	1993	2103	1627	1444	1355	1440	1218	980	1089	1211	1238	1109	772	970	631	921	802	569	616	701	493	535
d2_3	486810	16591	10006	8556	6699	5720	5154	5051	4817	4583	4940	3963	3598	3227	3130	3973	3048	2882	2804	2713	2797	2531	2396	2310	2207	1866	2391	1558	1861	1505	1367	1563	1222	1340	1141	986	774	1048	975	1005	921	492	876	655	475	488	573	554	366
d2_4	394204	17729	8701	7285	6823	6394	5377	4550	4217	5053	4180	3422	3455	3006	3044	2909	2842	2945	2269	2451	2443	2013	2389	2192	1590	1911	2009	1539	1700	1282	1573	1363	1365	1118	1280	1097	1128	1348	871	885	672	727	761	620	464	777	487	333	458
d2_5	327930	15087	8914	6238	5760	4931	5130	4658	3528	3756	3450	3564	3126	3009	3001	3289	2753	2483	2196	2132	2132	1696	2348	1929	2066	1572	1572	1584	1343	1612	1451	1450	1372	1262	1267	1156	967	975	909	731	796	640	725	608	791	512	439	503	530
d2_6	269840	13788	7704	6658	4982	4835	4313	3994	3473	3771	3243	2860	3045	3213	3453	2743	1968	2874	2248	2125	2106	1884	2070	2187	1585	1697	2017	1589	1442	1108	1128	1119	1288	1454	1059	1218	1122	1021	1042	745	756	621	748	758	556	466	542	479	440
d2_7	227290	13750	7792	5983	5351	4643	4067	3733	3849	3031	3571	3215	2794	2384	2856	2506	2323	2458	2115	2433	1921	1908	1908	1715	1803	1951	1646	1395	1604	1330	980	1027	1251	982	1030	1018	938	715	792	755	601	774	630	579	595	623	399	560	454
d2_8	189515	12263	7766	5897	4756	4029	3999	3244	3429	3592	3262	3128	2623	2496	2153	2397	2308	2449	1833	1973	2229	1934	1953	1828	1654	2031	1710	1387	1717	1259	1088	963	1244	1083	918	1271	843	818	829	643	794	887	751	706	657	754	509	353	321
d2_9	159391	11299	6198	5252	4663	4329	3127	3687	3407	3088	3094	2269	2489	2762	2487	1971	2698	2174	2032	2098	1788	2071	2065	1810	1444	1367	1362	1383	1270	1586	1269	1127	1071	1445	975	1094	902	994	669	740	842	746	546	658	846	549	682	549	396
d2_10	129938	10466	6614	5410	4173	3377	3373	3254	2729	2676	2875	2336	2314	2278	2269	2278	2305	1895	1774	1840	2170	1604	1857	1538	1488	1493	1360	1243	1214	1146	1217	1073	1253	992	1321	977	911	782	721	793	723	762	656	618	664	785	568	473	528
d2_11	113208	9193	5997	4113	4415	3077	3439	3135	2717	2750	2422	2410	2261	2627	2079	2138	1842	1851	2279	1907	1639	1988	1595	1345	1586	1478	1452	1431	1379	1390	1347	872	955	1432	964	964	786	964	1015	673	863	839	567	779	691	466	510	740	392
d2_12	96078	9374	5356	4122	3889	3304	3362	3026	2602	2820	2252	2425	2026	2390	2527	1856	1963	1672	1892	1751	1502	1570	1759	1364	1555	1341	1146	1304	1501	1328	1127	1275	1144	864	1214	1124	1039	771	933	826	782	705	663	639	711	514	529	543	590
d2_13	78947	8101	5288	3684	4047	3032	3192	3381	2577	2736	2006	2120	2353	2276	1871	1949	1907	2012	1750	1529	1606	1556	1656	1757	1503	1381	1283	1320	1354	1274	1330	1106	1239	1133	1038	1030	730	1046	791	1022	1065	618	648	745	812	912	527	618	439
d2_14	67397	7309	4729	3792	3133	2483	2761	2694	2299	2186	2385	2097	1821	2024	2261	1917	1778	1717	1529	1824	1563	1358	1257	1461	1400	1278	1788	1539	1227	1269	1073	1080	1029	1171	864	1105	992	893	1153	1302	841	702	694	1202	648	726	604	560	648
d2_15	56429	6257	4751	3431	2744	2749	2253	2228	2523	2107	2019	1666	1852	1967	1739	1917	1580	1778	1479	1796	1666	1588	1200	1438	1259	1614	1283	1459	1061	1542	1101	1076	1073	1318	1011	943	989	905	1051	914	848	791	684	694	801	729	595	573	560
d2_16	47995	6696	4692	3478	2984	2687	2288	2151	2191	2209	2062	1742	2007	1898	1570	1874	1788	1742	1695	1495	1614	1584	1312	1404	1411	1495	1344	1168	1187	880	1258	1057	1070	1031	1374	1074	980	980	900	792	793	676	678	800	646	780	578	656	530
d2_17	42138	5558	3479	3074	2535	2059	2508	2206	2002	1896	1725	1707	1769	1930	1768	1841	1837	1584	1369	1533	1733	1205	1522	1271	1401	1198	1397	973	1413	1189	1533	942	1016	1164	895	1217	915	772	928	771	728	752	924	770	697	641	668	643	563
d2_18	34547	6357	3395	3244	2301	2035	2157	2366	1781	1756	1727	1749	1764	1698	1465	1581	1488	1419	1470	1230	1759	1592	1322	1324	1230	1196	1312	1136	1383	1471	1044	1131	1233	829	1024	949	1001	1113	803	765	878	891	805	897	727	828	761	903	480
d2_19	29381	4907	3380	2581	2171	2064	1929	1851	2003	1894	1825	1827	1552	1630	1347	1810	1387	1344	1398	1604	1348	1296	1698	1346	1243	1569	1528	1073	1214	1251	1085	1300	1031	1080	983	853	976	1017	878	922	1007	839	700	776	599	718	712	754	1033
d2_20	26074	4005	2840	2450	2223	1603	1908	2126	1510	1810	1388	1714	1498	1515	1548	1315	1822	1213	1421	1281	1284	1329	1292	1179	1232	1399	1213	1070	1042	1004	1029	1039	973	1138	992	830	951	786	797	803	930	738	1004	869	640	1069	736	638	623
d2_21	23601	4122	2418	2523	2214	1736	1668	1599	1385	1554	1394	1578	1547	1305	1265	1607	1526	1382	1246	1253	1237	1211	1198	1097	1158	1256	1086	1211	1053	951	1010	1344	1134	935	1049	1118	1031	1020	764	796	853	819	661	778	840	659	791	614	653
d2_22	19002	3664	2370	2211	2258	1779	1536	1457	1596	1574	1471	1589	1670	1467	1436	1301	1505	1329	2110	1390	1257	1076	1507	1199	1284	1236	1230	1065	1088	1268	1247	1001	1045	870	1025	849	894	1006	960	836	834	809	701	711	707	765	808	787	625
d2_23	17139	3182	2248	2111	1851	1605	1526	1510	1438	1598	1476	1615	1430	1439	1479	1264	1148	1410	1213	1354	1243	1601	1115	1412	1354	1179	1354	1207	992	986	992	1137	983	925	760	966	850	808	1038	717	847	829	737	722	723	843	856	925	724
d2_24	15019	3327	2109	1747	1775	1599	1279	1343	1328	1605	1492	1336	1311	1316	1142	1251	1167	1604	1215	1300	1133	1614	959	1008	1150	1136	1088	864	987	820	1044	963	845	953	1059	815	1079	867	947	817	912	798	816	802	647	828	750	733	747
d2_25	11719	2812	1950	1733	1447	1763	1272	1099	1338	1236	1332	1453	1379	1188	1135	1110	1217	1215	1499	1076	1166	1126	1240	1051	1046	1140	1039	1108	1076	945	1146	1017	912	937	968	1299	1073	975	978	887	975	1022	1044	729	754	809	757	1290	664
d2_26	11164	2844	1999	1710	1457	1310	1209	1221	1258	1064	1273	1105	1006	1074	1099	1026	1154	1179	1216	1202	1151	955	786	1152	1035	919	1109	869	855	1111	882	940	1189	1054	951	849	903	993	1068	776	752	698	729	769	769	885	901	780	746
d2_27	9820	2558	1534	1420	1356	1321	1202	1271	1139	1039	1233	1343	1103	949	1158	1128	941	982	1054	999	1010	1033	1120	1118	1089	1077	978	960	1031	1080	1007	861	922	878	837	914	1217	868	1025	763	805	1003	641	826	928	821	871	624	754
d2_28	7806	2099	1502	1463	1343	976	1192	1011	1117	1119	1268	1026	1086	852	1056	1045	1465	1051	1099	843	1005	1008	802	876	1160	884	1183	1191	1086	882	807	945	1011	1134	805	825	825	964	912	952	833	980	720	665	769	891	825	790	670
d2_29	7339	2076	1411	1248	1035	1019	1257	1159	1052	1145	1243	1400	1167	926	1080	995	927	913	1016	927	819	908	1209	1000	975	1226	1195	972	966	993	1035	948	1061	934	909	841	805	999	861	751	750	760	1109	667	740	899	792	774	651
d2_30	6588	1718	1326	1151	1329	1308	1085	803	823	1006	926	946	982	965	886	873	1094	1038	997	900	796	893	916	1252	1119	837	1233	889	890	943	940	883	996	913	964	918	1105	840	914	1105	784	670	673	811	866	835	902	711	746
d2_31	5910	1641	1146	997	1136	898	954	956	895	821	822	813	1300	803	856	1044	831	992	949	784	1144	790	878	889	892	1080	726	846	965	911	1015	863	982	923	819	823	1018	1087	856	859	1064	823	752	862	912	677	741	766	804
d2_32	4693	1301	1143	896	1127	1173	719	871	940	723	825	740	901	767	768	874	913	1098	852	895	808	1007	856	846	950	970	841	786	843	1045	960	769	706	799	984	1176	950	789	989	686	780	798	762	757	843	842	994	854	778
d2_33	4426	1528	1056	1153	822	853	916	828	749	786	622	800	843	689	857	711	912	939	943	735	656	964	801	791	1046	795	1255	835	738	882	792	747	894	941	876	730	838	770	982	1004	876	864	852	687	838	739	674	1008	777
d2_34	3687	1321	959	833	892	741	805	806	967	762	685	811	1247	604	844	775	985	790	788	724	754	720	786	780	903	993	955	826	885	964	938	837	800	930	782	738	956	676	683	867	626	758	925	962	929	949	950	799	743
d2_35	3099	1318	890	891	775	825	843	727	761	705	639	700	683	755	711	1320	753	760	669	691	1027	1013	839	787	950	879	917	1120	816	839	862	881	876	862	792	880	771	980	849	821	902	841	934	788	1093	857	791	695	763
d2_36	2720	942	820	689	935	755	665	732	655	473	964	578	776	865	611	841	837	764	581	774	774	775	800	725	835	769	891	665	813	871	670	771	875	718	759	741	770	792	877	770	823	1283	823	915	851	1212	871	734	728
d2_37	2634	860	812	773	623	695	643	534	578	490	523	648	679	888	613	854	750	699	729	673	638	746	810	611	862	727	686	752	600	645	690	887	760	771	767	934	923	796	1059	1138	820	1175	710	1012	882	875	672	817	754
d2_38	2239	791	589	862	538	517	541	565	699	585	648	467	542	686	582	689	681	710	677	703	628	641	838	660	726	775	533	735	749	593	700	772	787	875	828	801	830	968	886	809	1090	763	910	1112	1606	868	906	754	781
d2_39	2268	627	805	499	653	459	512	479	484	809	535	620	615	698	595	558	627	616	773	758	538	590	795	637	693	773	838	869	854	754	856	1041	585	628	714	732	669	902	789	773	742	713	787	883	736	795	1010	943	721
d2_40	1639	659	544	451	438	398	447	615	509	447	514	535	544	487	594	640	547	972	518	742	772	586	825	602	565	641	732	575	642	1036	770	835	768	741	714	710	822	924	812	725	740	824	763	673	981	637	1096	762	1016
d2_41	1257	655	478	576	491	469	392	476	586	511	603	476	541	474	948	696	574	618	487	671	574	628	763	666	802	660	697	602	514	809	744	959	787	730	841	580	1070	959	757	887	1018	785	818	922	795	851	714	1054	617
d2_42	1109	417	532	357	475	509	513	465	459	446	633	435	437	440	434	713	572	609	590	661	568	613	745	547	447	723	703	633	577	527	771	695	682	999	968	630	813	877	796	763	782	979	1081	740	797	684	769	879	728
d2_43	1076	464	388	292	449	403	347	355	398	619	406	278	355	386	420	491	499	473	425	576	642	564	488	494	678	575	523	831	649	839	751	572	1108	739	916	492	803	764	826	681	845	641	1109	782	721	925	1063	920	1001
d2_44	1214	553	294	340	340	506	494	354	377	553	626	410	476	395	352	495	359	524	405	599	450	524	522	497	567	644	677	733	954	578	602	691	723	543	730	718	864	1028	842	800	682	810	877	886	857	1001	1053	1050	714
d2_45	1154	397	323	384	322	218	311	485	252	258	356	284	344	394	418	412	386	418	520	522	502	485	483	582	736	586	505	610	497	820	665	643	579	1179	614	769	585	1006	736	684	606	972	873	1020	686	959	705	1062	719
d2_46	544	257	275	269	293	283	248	205	412	354	226	336	288	441	469	435	383	570	286	929	375	443	481	928	812	544	497	704	553	723	543	538	630	728	762	983	1213	699	779	860	594	636	783	950	794	911	814	995	1111
d2_47	548	299	303	248	252	383	242	304	274	287	245	262	414	365	317	395	303	613	525	465	455	393	747	765	396	716	374	589	586	622	718	600	724	730	760	740	747	786	747	964	932	702	728	763	737	1063	953	791	845
d2_48	433	181	245	289	213	396	236	264	334	163	311	439	363	293	423	276	289	275	324	321	390	446	439	509	472	456	490	703	680	361	605	695	582	782	902	561	508	635	772	635	998	809	698	937	1006	698	1011	941	1258
d2_49	394	280	125	246	199	233	236	208	260	262	224	416	689	290	196	397	310	306	520	477	286	446	505	432	597	527	398	497	545	790	496	320	809	627	700	677	851	635	813	491	746	937	770	932	1130	725	673	1052	936
d2_50	313	208	203	159	111	393	155	284	324	428	243	376	299	239	312	278	313	459	399	338	319	326	467	355	369	426	537	614	739	484	708	506	615	488	566	514	709	833	771	703	943	565	1318	704	752	909	1125	1073	1182
d2_51	285	204	237	118	171	193	205	162	237	193	198	206	193	308	222	320	380	265	567	331	304	546	450	272	294	619	433	575	445	896	576	429	632	892	617	628	484	518	475	772	1127	1124	754	1026	755	898	1313	788	1028
d2_52	222	107	160	170	101	162	91	239	166	198	309	137	242	199	111	157	248	486	390	376	453	512	481	322	390	321	414	615	331	508	639	413	440	488	954	666	835	1115	767	830	961	953	1155	805	671	1185	1001	1055	808
d2_53	205	144	83	138	105	164	305	149	397	171	164	145	246	197	252	335	158	313	363	212	329	402	285	366	492	313	371	465	459	336	633	442	370	554	839	441	868	1071	775	742	914	789	798	1084	945	1101	857	1058	1227
d2_54	122	144	94	75	97	71	197	209	155	167	348	184	118	290	201	188	291	179	290	445	364	236	346	325	473	457	526	790	478	860	638	435	415	330	703	684	1069	841	672	1162	1014	776	944	958	824	1339	592	1159	1634
d2_55	123	66	35	83	142	90	232	91	189	181	286	279	286	254	315	262	207	196	413	238	318	306	358	211	414	562	517	613	604	722	818	834	671	869	545	549	815	616	1041	815	1264	770	802	824	717	1069	1230	1688	1293
d2_56	79	34	31	56	180	79	150	78	65	129	184	152	221	297	283	131	166	534	125	273	371	427	327	488	428	850	513	465	671	477	717	604	758	509	738	742	980	903	462	1015	1327	894	1129	1209	681	1314	1150	1124	1174
d2_57	123	94	50	99	76	43	59	105	197	309	198	223	138	125	140	228	337	210	160	262	453	173	481	491	379	434	220	335	428	518	459	866	468	739	885	671	1411	856	973	1077	1089	998	1435	1215	1309	1029	1240	1976	1257
d2_58	59	59	25	59	29	55	62	63	59	98	87	380	446	197	372	288	435	333	208	476	392	180	396	244	467	674	612	373	295	535	589	396	544	574	1118	852	923	625	735	835	1386	935	1484	1191	1301	1186	1449	1747	2313
d2_59	38	139	53	59	69	165	119	119	224	219	399	220	73	214	134	489	293	329	572	324	415	281	504	560	358	507	762	1013	599	1243	826	814	1245	976	542	1488	870	1923	1739	2070	1565	1637	1081	1622	1843	2081	1773	1802	1821
d2_60	176	176	771	575	303	277	431	622	1338	1309	1387	1352	1405	1806	1923	1559	2332	2619	2491	3067	2883	3332	3990	3771	5314	5463	5841	6150	7897	7037	6834	10133	9584	11278	10058	11992	13695	13586	13503	16252	15361	19325	18382	18958	19199	22656	23779	24979	26935
[truncated: 15 more columns]

## Sheet: Table S2c
Table S2c. Summary statistic for 21 demographic models associated with Figure S1.
Model 1	N_POP0	N_POP1	N_POP2	N_ANCAll	N_ANC12	TDIV12	TDIV0_ANC12	MaxEstLhood	MaxObsLhood
	68431	21620	36135	263593	3896609	10109	20189	-1.8362e+08	-1.66504e+08
Model 2	N_POP0	N_POP1	N_POP2	N_ANCAll	N_ANC20	TDIV20	TDIV1_ANC20	MaxEstLhood	MaxObsLhood
	40387	35836	43919	286861	72337	10091	20373	-1.82951e+08	-1.66504e+08
Model 3	N_POP0	N_POP1	N_POP2	N_ANCAll	N_ANC01	TDIV01	TDIV2_ANC01	MaxEstLhood	MaxObsLhood
	35550	21720	61807	263868	364128	10063	20282	-1.83626e+08	-1.66504e+08
Model 4	N_POP0	N_POP1	N_POP2	N_ANCAll	TDIV	MaxEstLhood	MaxObsLhood
	42101	23942	38201	106267	10467	-1.82958e+08	-1.66504e+08
Model 5	N_POP0	N_POP1	N_POP2	N_ANCAll	N_ANC20	N_ancPOP1	TDIV20	TDIV1_ANC20	TBOT_Nstart	TBOT_Nend	N_BOT1	MaxEstLhood	MaxObsLhood
	49632	12069	53995	285229	75484	463413	10278	20770	4871	3871	5865	-1.82693e+08	-1.66504e+08
Model 6	N_POP0	N_POP1	N_POP2	N_ANCAll	N_ANC20	N_ancPOP1	TDIV20	TDIV1_ANC20	TBOT_Nend	TBOT_Nstart	N_BOT1	MaxEstLhood	MaxObsLhood
	49545	24616	53331	281848	77076	496364	10225	20701	10872	11872	17134	-1.82787e+08	-1.66504e+08
Model 7	N_POP0	N_POP1	N_POP2	N_ANCAll	N_ANC20	N_ancPOP2	TDIV20	TDIV1_ANC20	TBOT_Nstart	TBOT_Nend	N_BOT2	MaxEstLhood	MaxObsLhood
	53706	38187	32227	279132	75600	110346	10019	20299	3063	2063	22533	-1.82913e+08	-1.66504e+08
Model 8	N_POP0	N_POP1	N_POP2	N_ANCAll	N_ANC20	N_ancPOP0	TDIV20	TDIV1_ANC20	TBOT_Nstart	TBOT_Nend	N_BOT0	MaxEstLhood	MaxObsLhood
	4298165	39801	55766	4475018	1081999	265795	10047	20463	1458	458	7298	-1.8295e+08	-1.66504e+08
Model 9	N_POP0	N_POP1	N_POP2	N_ANCAll	N_ANC20	N_ancPOP0	TDIV20	TDIV1_ANC20	TBOT_Nend	TBOT_Nstart	N_BOT0	MaxEstLhood	MaxObsLhood
	62535	38755	53805	26524	93083	680523	10290	20604	11778	12778	4278	-1.83077e+08	-1.66504e+08
Model 10	N_POP0	N_POP1	N_POP2	N_ANCAll	N_ANC20	TDIV20	TDIV1_ANC20	N1atSPLIT	GrowthP1	MaxEstLhood	MaxObsLhood
	50183	244044	51322	284852	68259	10208	20333	86449	-0.000101665	-1.82801e+08	-1.66504e+08
Model 11	N_POP0	N_POP1	N_POP2	N_ANCAll	N_ANC20	TDIV20	TDIV1_ANC20	N1atSPLIT	GrowthP1	MaxEstLhood	MaxObsLhood
	48431	166915	54998	280593	76278	10041	20338	58018	-0.000105242	-1.8279e+08	-1.66504e+08
Model 12	N_POP0	N_POP1	N_POP2	N_ANCAll	N_ANC20	TDIV20	TDIV1_ANC20	N2atSPLIT	GrowthP2	MaxEstLhood	MaxObsLhood
	52495	38129	246116	273651	75545	10263	20366	65209	-0.000129417	-1.82949e+08	-1.66504e+08
Model 13	N_POP0	N_POP1	N_POP2	N_ANCAll	N_ANC20	TDIV20	TDIV1_ANC20	N0atSPLIT	GrowthP0	MaxEstLhood	MaxObsLhood
	55301	37221	56846	343832	74280	10085	20203	50003	-9.98592e-06	-1.82948e+08	-1.66504e+08
Model 14	N_POP0	N_POP1	N_POP2	N_ANCAll	N_ANC20	TDIV20	TDIV1_ANC20	N0atSPLIT	GrowthP0	MaxEstLhood	MaxObsLhood
	58979	36511	48286	556573	102455	10082	20475	41834	-3.40678e-05	-1.82961e+08	-1.66504e+08
Model 15	N_POP0	N_POP1	N_POP2	N_ANCAll	N_ANC20	N_ancPOP1	N_ancPOP2	TDIV20	TDIV1_ANC20	TBOT_Nstart1	TBOT_Nend1	TBOT_Nstart2	TBOT_Nend2	N0atSPLIT	N_BOT1	N_BOT2	GrowthP0	MaxEstLhood	MaxObsLhood
	65664	16136	23746	594870	156779	551524	512339	10063	20352	7316	6316	3254	2254	44989	14232	15307	-3.75765e-05	-1.82651e+08	-1.66504e+08
Model 16	N_POP0	N_POP1	N_POP2	N_ANCAll	N_ANC20	N_ancPOP1	N_ancPOP2	TDIV20	MIG01	MIG10	MIG02	MIG20	MIG12	MIG21	MIG1A	MIGA1	TDIV1_ANC20	TBOT_Nstart1	TBOT_Nend1	TBOT_Nstart2	TBOT_Nend2	N0atSPLIT	N_BOT1	N_BOT2	GrowthP0	MaxEstLhood	MaxObsLhood
	59292	10074	10610	2020590	102612	409540	427011	35468	5.22548e-10	0.000122316	3.01833e-05	8.88173e-05	1.35907e-08	4.22245e-06	8.02504e-09	6.15914e-10	1029336	1682	682	1088	88	61297	1995	8220	9.37648e-07	-1.73153e+08	-1.66504e+08
Model 17	N_POP0	N_POP1	N_POP2	N_ANCAll	N_ANC20	N_ancPOP1	N_ancPOP2	TDIV20	MIG01	MIG10	MIG02	MIG20	MIG12	MIG21	TDIV1_ANC20	TBOT_Nstart1	TBOT_Nend1	TBOT_Nstart2	TBOT_Nend2	N0atSPLIT	N_BOT1	N_BOT2	GrowthP0	MaxEstLhood	MaxObsLhood
	78914	10285	39781	7188952	430397	514767	730970	32834	3.58096e-09	8.43327e-05	2.38436e-05	0.000106064	6.00373e-05	6.97015e-06	845395	1008	8	1073	73	40157	2130	7395	-2.05751e-05	-1.73126e+08	-1.66504e+08
Model 18	N_POP0	N_POP1	N_POP2	N_ANCAll	N_ANC20	N_ancPOP1	N_ancPOP2	TDIV20	MIG01	MIG10	TDIV1_ANC20	TBOT_Nstart1	TBOT_Nend1	TBOT_Nstart2	TBOT_Nend2	N0atSPLIT	N_BOT1	N_BOT2	GrowthP0	MaxEstLhood	MaxObsLhood
	66500	11975	24817	5531282	256343	876742	881198	10243	1.91033e-06	0.000404082	311341	1023	23	1145	145	40184	1519	20006	-4.91783e-05	-1.75101e+08	-1.66504e+08
Model 19	N_POP0	N_POP1	N_POP2	N_ANCAll	N_ANC20	N_ancPOP1	N_ancPOP2	TDIV20	MIG12	MIG21	TDIV1_ANC20	TBOT_Nstart1	TBOT_Nend1	TBOT_Nstart2	TBOT_Nend2	N0atSPLIT	N_BOT1	N_BOT2	GrowthP0	MaxEstLhood	MaxObsLhood
	864862	11246	21274	19036498	965427	415206	126588	10267	0.000362186	3.17425e-06	188680	1005	5	1329	329	229739	1623	16698	-0.000129115	-1.75449e+08	-1.66504e+08
Model 20	N_POP0	N_POP1	N_POP2	N_ANCAll	N_ANC20	N_ancPOP1	N_ancPOP2	TDIV20	MIG02	MIG20	TDIV1_ANC20	TBOT_Nstart1	TBOT_Nend1	TBOT_Nstart2	TBOT_Nend2	N0atSPLIT	N_BOT1	N_BOT2	GrowthP0	MaxEstLhood	MaxObsLhood
	18098	51407	11458	4076065	6964048	380317	854434	14954	9.4425e-05	0.000129286	26045	1130	130	1016	16	5020	2087	6134	-8.57544e-05	-1.81643e+08	-1.66504e+08
Model 21	N_POP0	N_POP1	N_POP2	N_ANCAll	N_ANC20	N_ancPOP1	N_ancPOP2	TDIV20	MIG01	MIG10	MIG02	MIG20	TDIV1_ANC20	TBOT_Nstart1	TBOT_Nend1	TBOT_Nstart2	TBOT_Nend2	N0atSPLIT	N_BOT1	N_BOT2	GrowthP0	MaxEstLhood	MaxObsLhood
	535074	15180	12753	10008909	268072	803165	438702	10402	4.43543e-06	0.000327264	4.46974e-08	0.000334238	90800	1006	6	4679	3679	183483	1618	9141	-0.000102892	-1.73502e+08	-1.66504e+08
Note. Time of demographic events (TDIV/TBOT) here are defined in generations, the average generation interval time in Populus was 15 years. Effective population size (N) here are defined in number of haploid individuals.
